# Supplementary material for: Highly selective intramolecular addition of C–N and S–N bonds to alkynes catalyzed by palladium: a practical access to two distinct functional indoles
Source: Royal Society of Chemistry journal article supplement (doi:10.1039/c6ra15945a), 2016-01-01

# Highly Selective Intramolecular Addition of C-N and S-N Bonds to Alkynes Catalyzed by Palladium: A Practical Access to Two Distinct Functional Indoles

## Supporting Information

Chenglin Wu,<sup>‡abc</sup> Fei Zhao,<sup>‡d</sup> Yonglei Du,<sup>bc</sup> Liang Zhao,<sup>bc</sup> Liang Chen,<sup>bc</sup> Jiang Wang,  
<sup>bc</sup> Hong Liu\*<sup>abc</sup>

<sup>a</sup> School of Pharmacy, China Pharmaceutical University, Jiangsu, Nanjing 210009,  
China

<sup>b</sup> CAS Key Laboratory of Receptor Research, Shanghai Institute of Materia Medica,  
Chinese Academy of Sciences, 555 Zu Chong Zhi Road, Zhangjiang Hi-Tech Park,  
Shanghai 201203, People's Republic of China. E-mail: hliu@simm.ac.cn

<sup>c</sup> University of Chinese Academy of Sciences, No.19A Yuquan Road, Beijing 100049,  
China

<sup>d</sup> Antibiotics Research and Re-evaluation Key Laboratory of Sichuan Province,  
Sichuan Industrial Institute of Antibiotics, Chengdu University, 168 Hua Guan Road,  
Chengdu 610052, People's Republic of China

<sup>‡</sup>These authors contributed equally to this work.

|                                                                    |             |
|--------------------------------------------------------------------|-------------|
| <b>Preparation and Characterization data of the materials.....</b> | <b>2-7</b>  |
| <b><sup>1</sup>H and <sup>13</sup>C NMR Spectra.....</b>           | <b>8-45</b> |

## Preparation and Characterization data of the materials

### Procedure for the preparation of 1a

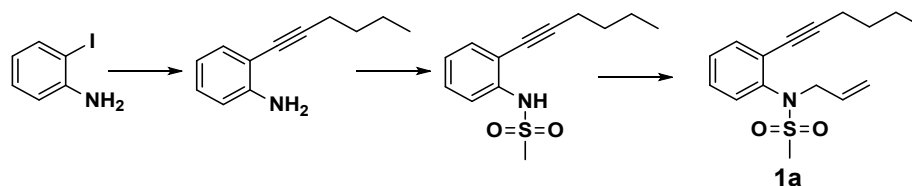

To a solution of 2-iodoaniline (1.0 g, 4.57 mmol) in DMF (5.0 ml) and Et<sub>3</sub>N (5.0 ml) was added PdCl<sub>2</sub>(PPh<sub>3</sub>)<sub>2</sub> (160.2 mg, 0.228 mmol), CuI (87.0 mg, 0.457 mmol), and 1-hexyne (5.48 mmol, 634 μl), and the resulting mixture was stirred at room temperature for 6 hours. Then water was added and the reaction mixture was extracted with ethyl acetate. The organic extracts were washed with brine, dried over Na<sub>2</sub>SO<sub>4</sub>, and concentrated. The residue was purified to give 2-(Hex-1-yn-1-yl)aniline (720 mg, 91.0%). To a solution of 2-(Hex-1-yn-1-yl)aniline (720 mg, 4.16 mmol) in pyridine (5.0 ml) was added methanesulfonyl chloride (4.57 mmol, 354 μl) dropwise at 0 °C. After addition, the mixture was allowed to stir at room temperature for 5 hours, then 1 mol/L HCl was added and the reaction mixture was extracted with ethyl acetate. The organic extracts were washed with saturated aqueous NaHCO<sub>3</sub> solution, dried over Na<sub>2</sub>SO<sub>4</sub> and concentrated. The residue was purified to give *N*-(2-(Hex-1-yn-1-yl)phenyl)methanesulfonamide (960 mg, 91.9%). To a solution of *N*-(2-(Hex-1-yn-1-yl)phenyl)methanesulfonamide (960 mg, 3.82 mmol) in anhydrous DMF (6.0 ml) was added NaH (110.0 mg, 4.58 mmol) by portion at 0 °C, 30 minutes later, allyl bromide (5.73 mmol, 495.1 μL) was added dropwise at 0 °C. The resulting mixture was stirred at room temperature for 8 hours, and water was added and the reaction mixture was extracted with ethyl acetate, the organic extracts were washed with brine, dried over Na<sub>2</sub>SO<sub>4</sub> and concentrated. The residue was purified to give *N*-Allyl-*N*-(2-(hex-1-yn-1-yl)phenyl)methanesulfonamide (**1a**) (900 mg, 80.9%). <sup>1</sup>H NMR (400 MHz, CDCl<sub>3</sub>) δ 7.48-7.43 (m, 1H), 7.37-7.33 (m, 1H), 7.32-7.25 (m, 2H), 5.9-5.79 (m, 1H), 5.15-5.05 (m, 2H), 4.35 (d, *J* = 6.3 Hz, 2H), 3.01 (s, 3H), 2.46 (t, *J* = 7.1 Hz, 2H), 1.64-1.58 (m, 2H), 1.53-1.44 (m, 2H), 0.96 (t, *J* = 7.3 Hz, 3H); EI-MS (*m/z*): 291 (M<sup>+</sup>).

Compounds **1b-1o** were prepared following the similar procedure carried out for **1a**.

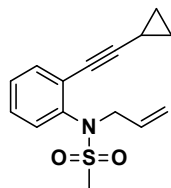

*N*-Allyl-*N*-(2-(cyclopropylethynyl)phenyl)methanesulfonamide (**1b**):  $^1\text{H}$  NMR (400 MHz,  $\text{CDCl}_3$ )  $\delta$  7.44-7.40 (m, 1H), 7.34-7.29 (m, 1H), 7.29-7.22 (m, 2H), 5.92-5.76 (m, 1H), 5.15-5.06 (m, 2H), 4.32 (d,  $J = 6.4$  Hz, 2H), 3.01 (s, 3H), 1.53-1.44 (m, 1H), 0.96-0.89 (m, 2H), 0.83-0.78 (m, 2H); EI-MS ( $m/z$ ): 275 ( $\text{M}^+$ ).

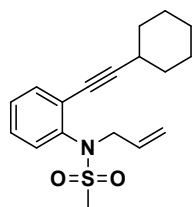

*N*-Allyl-*N*-(2-(cyclohexylethynyl)phenyl)methanesulfonamide (**1c**):  $^1\text{H}$  NMR (400 MHz,  $\text{CDCl}_3$ )  $\delta$  7.45 (dd,  $J = 6.8, 2.5$  Hz, 1H), 7.35 (dd,  $J = 7.6, 1.8$  Hz, 1H), 7.31-7.25 (m, 2H), 5.93-5.77 (m, 1H), 5.17-5.04 (m, 2H), 4.37 (d,  $J = 6.3$  Hz, 2H), 3.01 (s, 3H), 2.67-2.56 (m, 1H), 1.99-1.87 (m, 2H), 1.82-1.70 (m, 2H), 1.60-1.47 (m, 3H), 1.42-1.31 (m, 3H); EI-MS ( $m/z$ ): 317 ( $\text{M}^+$ ).

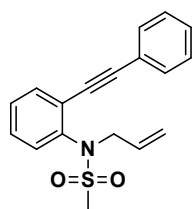

*N*-Allyl-*N*-(2-(phenylethynyl)phenyl)methanesulfonamide (**1d**):  $^1\text{H}$  NMR (400 MHz,  $\text{CDCl}_3$ )  $\delta$  7.62-7.54 (m, 3H), 7.44-7.31 (m, 6H), 5.98-5.86 (m, 1H), 5.22-5.07 (m, 2H), 4.46 (d,  $J = 6.5$  Hz, 2H), 3.06 (s, 3H); EI-MS ( $m/z$ ): 311 ( $\text{M}^+$ ).

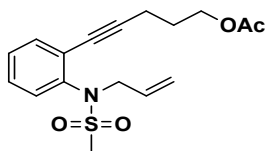

5-(2-(*N*-Allylmethylsulfonamido)phenyl)pent-4-yn-1-yl acetate (**1e**):  $^1\text{H}$  NMR (400 MHz,  $\text{CDCl}_3$ )  $\delta$  7.49-7.43 (m, 1H), 7.34-7.26 (m, 3H), 5.91-5.79 (m, 1H), 5.17-5.06 (m, 2H), 4.33 (d,  $J = 6.5$  Hz, 2H), 4.22 (t,  $J = 6.3$  Hz, 2H), 3.00 (s, 3H), 2.56 (t,  $J = 7.2$  Hz, 2H), 2.07 (s, 3H), 2.00-1.92 (m, 2H); EI-MS ( $m/z$ ): 335 ( $\text{M}^+$ ).

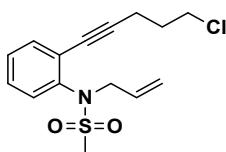

*N*-Allyl-*N*-(2-(5-chloropent-1-yn-1-yl)phenyl)methanesulfonamide (**1f**):  $^1\text{H}$  NMR (400 MHz,  $\text{CDCl}_3$ )  $\delta$  7.48-7.44 (m, 1H), 7.36-7.26 (m, 3H), 5.91-5.79 (m, 1H), 5.16-5.06 (m, 2H), 4.32 (d,  $J = 6.4$  Hz, 2H), 3.73 (t,  $J = 6.2$  Hz, 2H), 3.01 (s, 3H), 2.67 (t,  $J = 6.9$  Hz, 2H), 2.11-2.04 (m, 2H); EI-MS ( $m/z$ ): 313 ( $\text{M}^+$ , ( $\text{Cl}^{37}$ )), 311 ( $\text{M}^+$ , ( $\text{Cl}^{35}$ )).

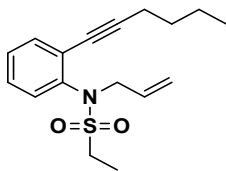

*N*-Allyl-*N*-(2-(hex-1-yn-1-yl)phenyl)ethanesulfonamide (**1g**):  $^1\text{H}$  NMR (400 MHz,  $\text{CDCl}_3$ )  $\delta$  7.46-7.39 (m, 1H), 7.39-7.31 (m, 1H), 7.30-7.20 (m, 2H), 5.93-5.76 (m, 1H), 5.13-4.97 (m, 2H), 4.35 (d,  $J = 6.5$  Hz, 2H), 3.12 (q,  $J = 7.4$  Hz, 2H), 2.45 (t,  $J = 7.1$  Hz, 2H), 1.64-1.56 (m, 2H), 1.52-1.44 (m, 2H), 1.40 (t,  $J = 7.4$  Hz, 3H), 0.94 (t,  $J = 7.3$  Hz, 3H); EI-MS ( $m/z$ ): 305 ( $\text{M}^+$ ).

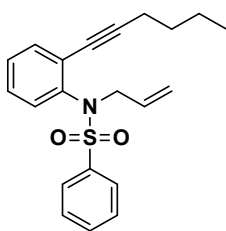

*N*-Allyl-*N*-(2-(hex-1-yn-1-yl)phenyl)benzenesulfonamide (**1h**):  $^1\text{H}$  NMR (400 MHz,

CDCl<sub>3</sub>)  $\delta$  7.76-7.67 (m, 2H), 7.57-7.50 (m, 1H), 7.47-7.40 (m, 2H), 7.36-7.31 (m, 1H), 7.24-7.16 (m, 3H), 5.89-5.75 (m, 1H), 5.11-4.99 (m, 2H), 4.30 (d,  $J = 6.4$  Hz, 2H), 2.11 (t,  $J = 6.9$  Hz, 2H), 1.44-1.32 (m, 4H), 0.90 (t,  $J = 7.1$  Hz, 3H); EI-MS ( $m/z$ ): 353 ( $M^+$ ).

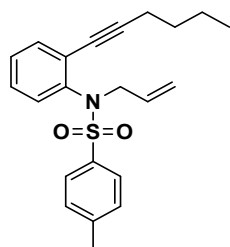

*N*-Allyl-*N*-(2-(hex-1-yn-1-yl)phenyl)-4-methylbenzenesulfonamide (**1i**): <sup>1</sup>H NMR (400 MHz, CDCl<sub>3</sub>)  $\delta$  7.63 (d,  $J = 8.3$  Hz, 2H), 7.37-7.32 (m, 1H), 7.26-7.19 (m, 5H), 5.88-5.77 (m, 1H), 5.09-5.00 (m, 2H), 4.29 (d,  $J = 6.4$  Hz, 2H), 2.41 (s, 3H), 2.14 (t,  $J = 6.9$  Hz, 2H), 1.46-1.36 (m, 4H), 0.92 (t,  $J = 7.1$  Hz, 3H); EI-MS ( $m/z$ ): 367 ( $M^+$ ).

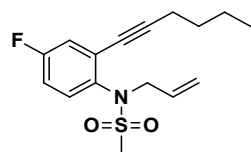

*N*-Allyl-*N*-(4-fluoro-2-(hex-1-yn-1-yl)phenyl)methanesulfonamide (**1j**): <sup>1</sup>H NMR (400 MHz, CDCl<sub>3</sub>)  $\delta$  7.32-7.23 (m, 1H), 7.12 (dd,  $J = 8.8, 3.0$  Hz, 1H), 7.03-6.91 (m, 1H), 5.91-5.75 (m, 1H), 5.18-5.02 (m, 2H), 4.30 (d,  $J = 5.7$  Hz, 2H), 3.00 (s, 3H), 2.45 (t,  $J = 7.1$  Hz, 2H), 1.64-1.56 (m, 2H), 1.52-1.42 (m, 2H), 0.95 (t,  $J = 7.3$  Hz, 3H); EI-MS ( $m/z$ ): 309 ( $M^+$ ).

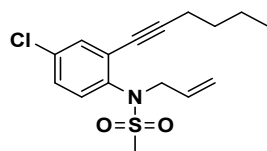

*N*-Allyl-*N*-(4-chloro-2-(hex-1-yn-1-yl)phenyl)methanesulfonamide (**1k**): <sup>1</sup>H NMR (400 MHz, CDCl<sub>3</sub>)  $\delta$  7.45-7.41 (m, 1H), 7.27-7.24 (m, 2H), 5.89-5.74 (m, 1H), 5.14-5.08 (m, 2H), 4.32 (d,  $J = 6.4$  Hz, 2H), 3.00 (s, 3H), 2.46 (t,  $J = 7.1$  Hz, 2H), 1.62-1.58 (m, 2H), 1.51-1.44 (m, 2H), 0.96 (t,  $J = 7.3$  Hz, 3H); EI-MS ( $m/z$ ): 327 ( $M^+$ ,

(Cl<sup>37</sup>), 325 (M<sup>+</sup>, (Cl<sup>35</sup>)).

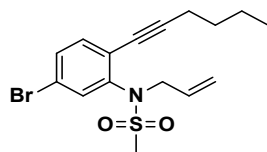

*N*-Allyl-*N*-(5-bromo-2-(hex-1-yn-1-yl)phenyl)methanesulfonamide (**11**): <sup>1</sup>H NMR (400 MHz, CDCl<sub>3</sub>) δ 7.59 (d, *J* = 2.4 Hz, 1H), 7.41 (dd, *J* = 8.5, 2.4 Hz, 1H), 7.19 (d, *J* = 8.5 Hz, 1H), 5.88-5.76 (m, 1H), 5.14-5.08 (m, 2H), 4.31 (d, *J* = 6.5 Hz, 2H), 2.99 (s, 3H), 2.45 (t, *J* = 7.1 Hz, 2H), 1.64-1.57 (m, 2H), 1.52-1.44 (m, 2H), 0.95 (t, *J* = 7.3 Hz, 3H); EI-MS (*m/z*): 371 (M<sup>+</sup>, (Br<sup>81</sup>)), 369 (M<sup>+</sup>, (Br<sup>79</sup>)).

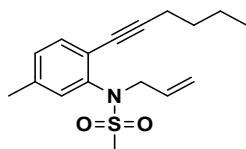

*N*-Allyl-*N*-(2-(hex-1-yn-1-yl)-5-methylphenyl)methanesulfonamide (**1m**): <sup>1</sup>H NMR (400 MHz, CDCl<sub>3</sub>) δ 7.33 (d, *J* = 7.9 Hz, 1H), 7.16 (s, 1H), 7.07 (dd, *J* = 7.9, 1.1 Hz, 1H), 5.90-5.78 (m, 1H), 5.16-5.06 (m, 2H), 4.34 (d, *J* = 6.4 Hz, 2H), 3.00 (s, 3H), 2.44 (t, *J* = 7.1 Hz, 2H), 2.33 (s, 3H), 1.62-1.56 (m, 2H), 1.52-1.43 (m, 2H), 0.95 (t, *J* = 7.3 Hz, 3H); EI-MS (*m/z*): 305 (M<sup>+</sup>).

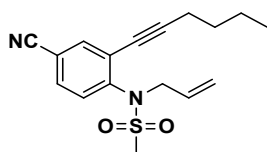

*N*-Allyl-*N*-(4-cyano-2-(hex-1-yn-1-yl)phenyl)methanesulfonamide (**1n**): <sup>1</sup>H NMR (400 MHz, CDCl<sub>3</sub>) δ 7.73 (d, *J* = 1.9 Hz, 1H), 7.55 (dd, *J* = 8.3, 2.0 Hz, 1H), 7.44 (d, *J* = 8.3 Hz, 1H), 5.86-5.70 (m, 1H), 5.20-5.04 (m, 2H), 4.35 (d, *J* = 6.5 Hz, 2H), 3.01 (s, 3H), 2.47 (t, *J* = 7.1 Hz, 2H), 1.65-1.56 (m, 2H), 1.53-1.43 (m, 2H), 0.95 (t, *J* = 7.3 Hz, 3H); EI-MS (*m/z*): 316 (M<sup>+</sup>).

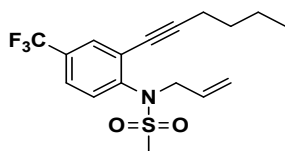

*N*-Allyl-*N*-(2-(hex-1-yn-1-yl)-4-(trifluoromethyl)phenyl)methanesulfonamide (**10**):  $^1\text{H}$  NMR (400 MHz,  $\text{CDCl}_3$ )  $\delta$  7.71 (d,  $J = 2.0$  Hz, 1H), 7.53 (dd,  $J = 8.4, 2.0$  Hz, 1H), 7.46 (d,  $J = 8.4$  Hz, 1H), 5.89-5.77 (m, 1H), 5.15-5.09 (m, 2H), 4.37 (d,  $J = 6.5$  Hz, 2H), 3.02 (s, 3H), 2.48 (t,  $J = 7.1$  Hz, 2H), 1.64-1.59 (m, 2H), 1.52-1.46 (m, 2H), 0.96 (t,  $J = 7.3$  Hz, 3H); EI-MS ( $m/z$ ): 359 ( $\text{M}^+$ ).

# <sup>1</sup>H and <sup>13</sup>C NMR Spectra

## *N*-Allyl-*N*-(2-(hex-1-yn-1-yl)phenyl)methanesulfonamide (**1a**)

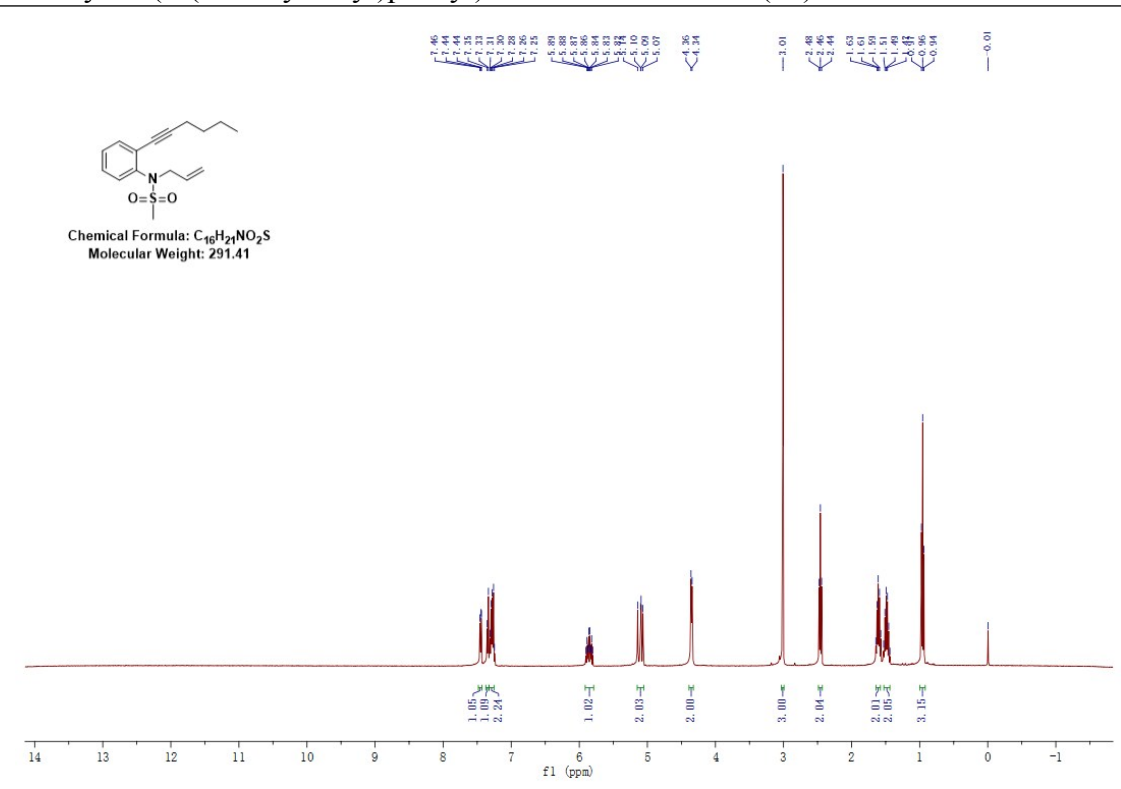

## *N*-Allyl-*N*-(2-(cyclopropylethynyl)phenyl)methanesulfonamide (**1b**)

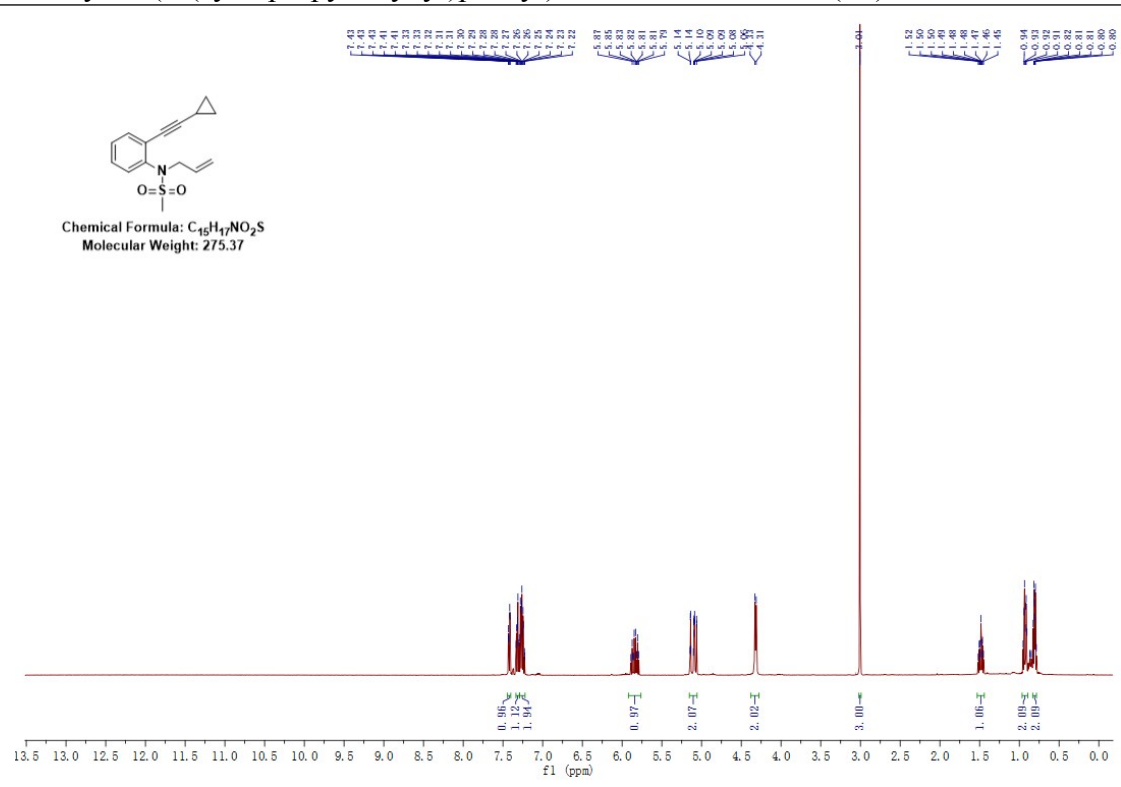



### *N*-Allyl-*N*-(2-(cyclohexylethynyl)phenyl)methanesulfonamide (**1c**)

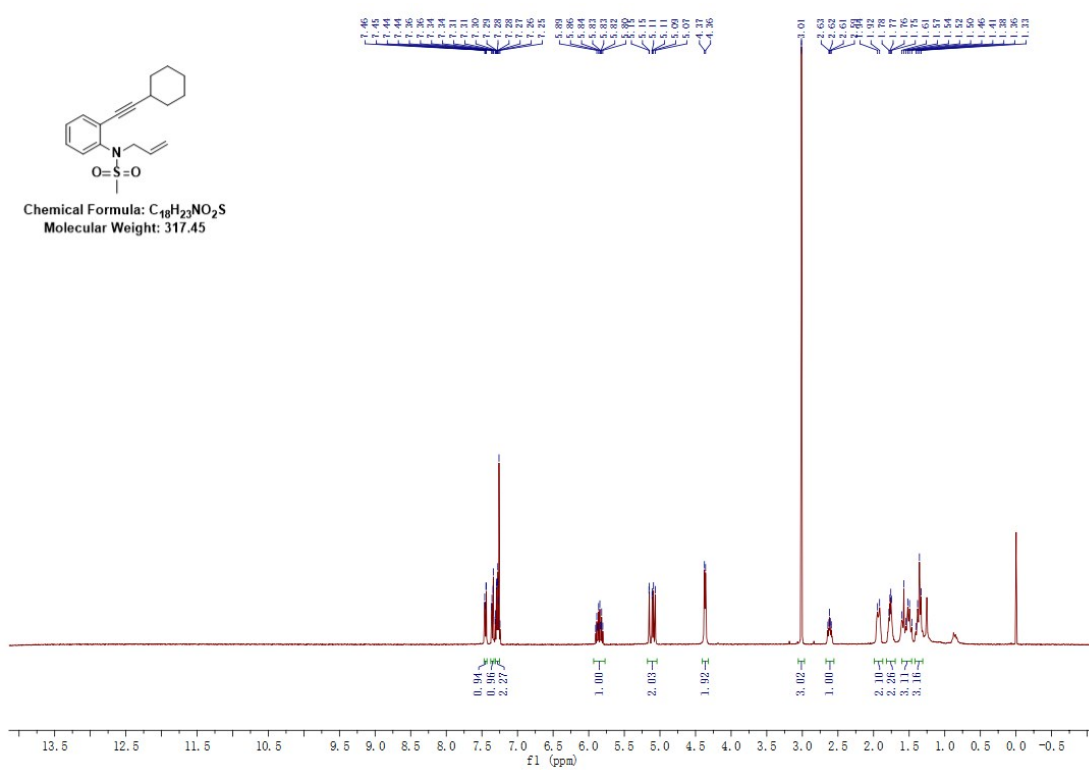

### *N*-Allyl-*N*-(2-(phenylethynyl)phenyl)methanesulfonamide (**1d**)

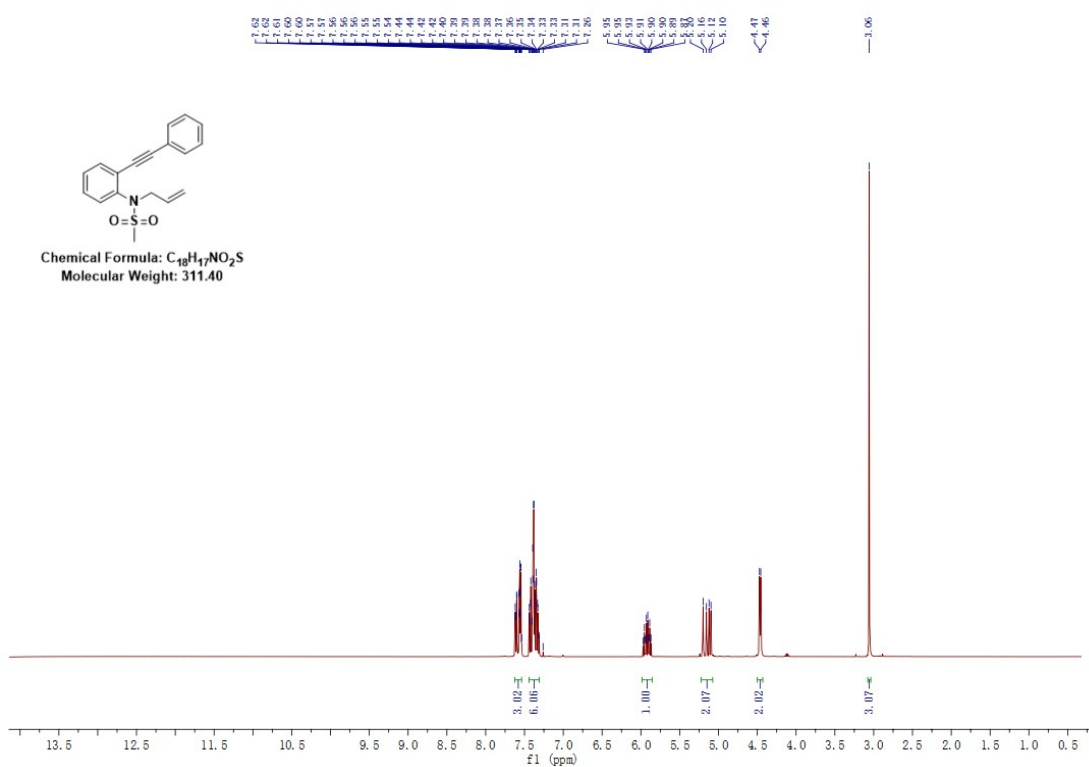

5-(2-(*N*-Allylmethylsulfonamido)phenyl)pent-4-yn-1-yl acetate (**1e**)

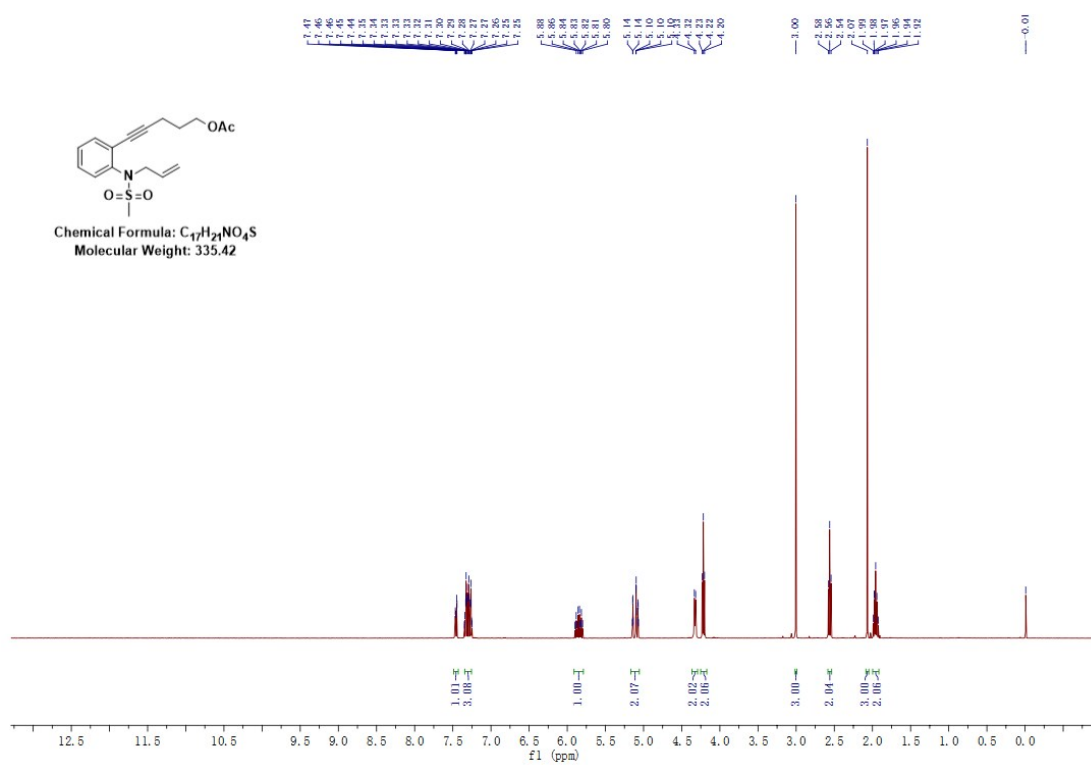

*N*-Allyl-*N*-(2-(5-chloropent-1-yn-1-yl)phenyl)methanesulfonamide (**1f**)

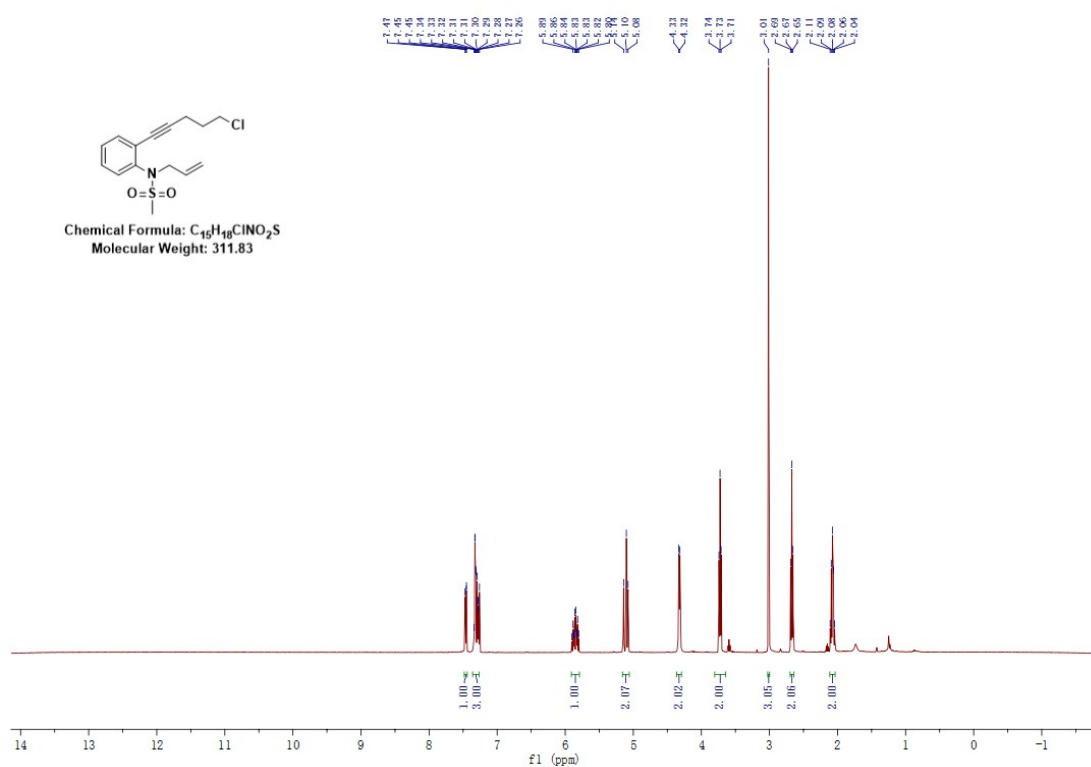

### *N*-Allyl-*N*-(2-(hex-1-yn-1-yl)phenyl)ethanesulfonamide (**1g**)

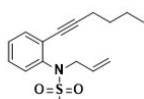

Chemical Formula: C<sub>17</sub>H<sub>23</sub>NO<sub>2</sub>S  
Molecular Weight: 305.44

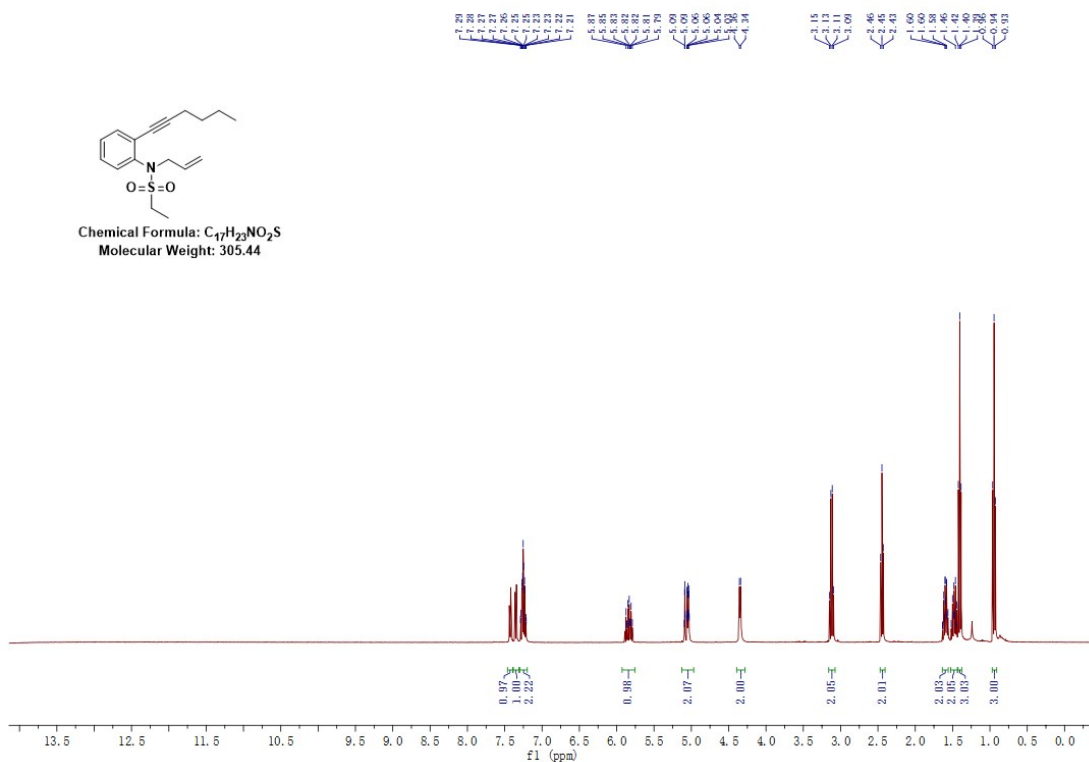

### *N*-Allyl-*N*-(2-(hex-1-yn-1-yl)phenyl)benzenesulfonamide (**1h**)

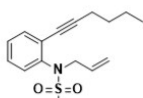

Chemical Formula: C<sub>21</sub>H<sub>23</sub>NO<sub>2</sub>S  
Molecular Weight: 353.48

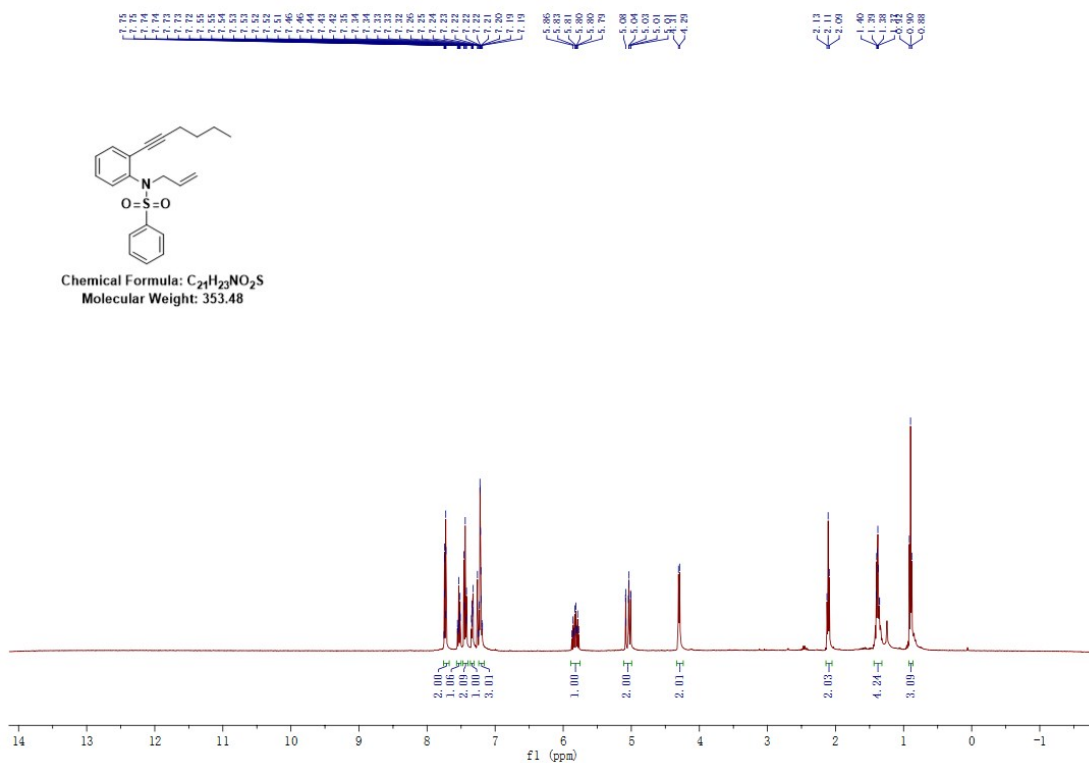

### *N*-Allyl-*N*-(2-(hex-1-yn-1-yl)phenyl)-4-methylbenzenesulfonamide (**1i**)

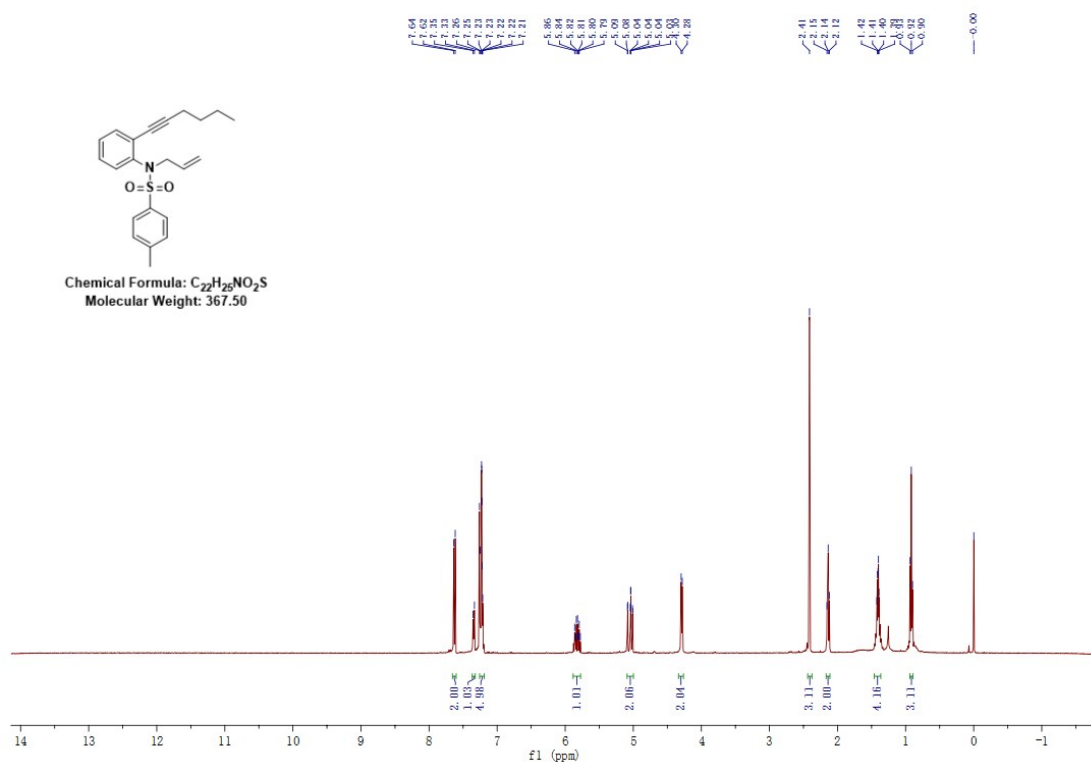

### *N*-Allyl-*N*-(4-fluoro-2-(hex-1-yn-1-yl)phenyl)methanesulfonamide (**1j**)

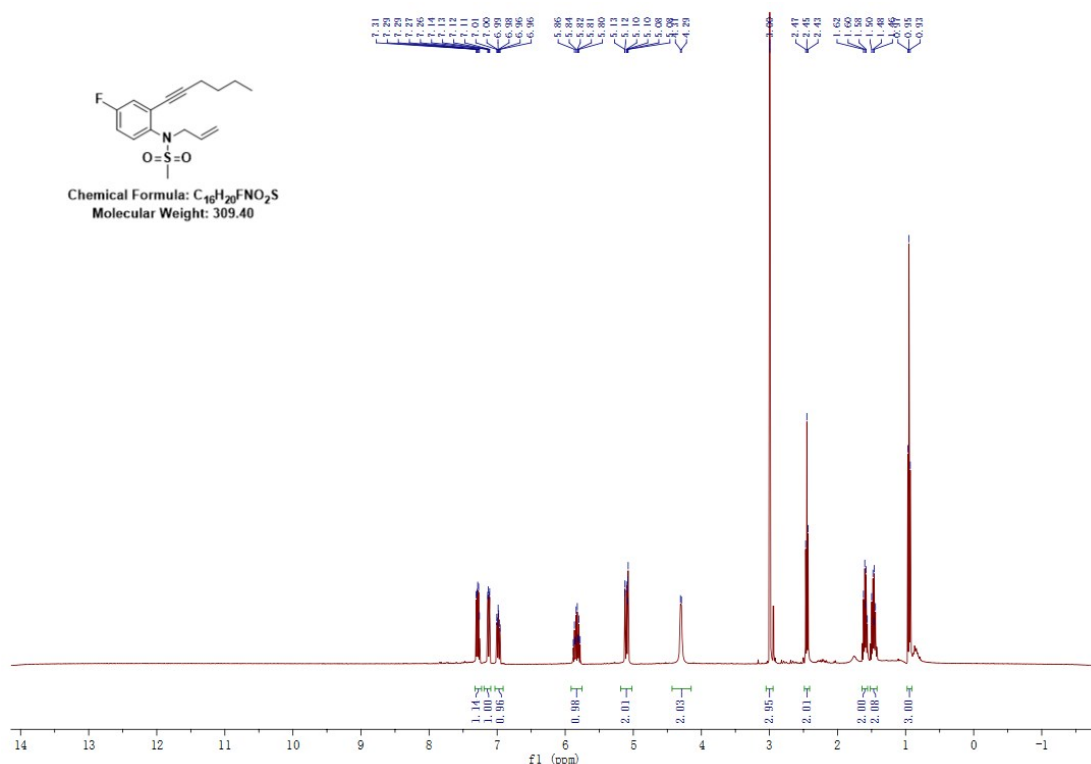

### *N*-Allyl-*N*-(4-chloro-2-(hex-1-yn-1-yl)phenyl)methanesulfonamide (**1k**)

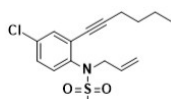

Chemical Formula: C<sub>16</sub>H<sub>20</sub>ClNO<sub>2</sub>S  
Molecular Weight: 325.85

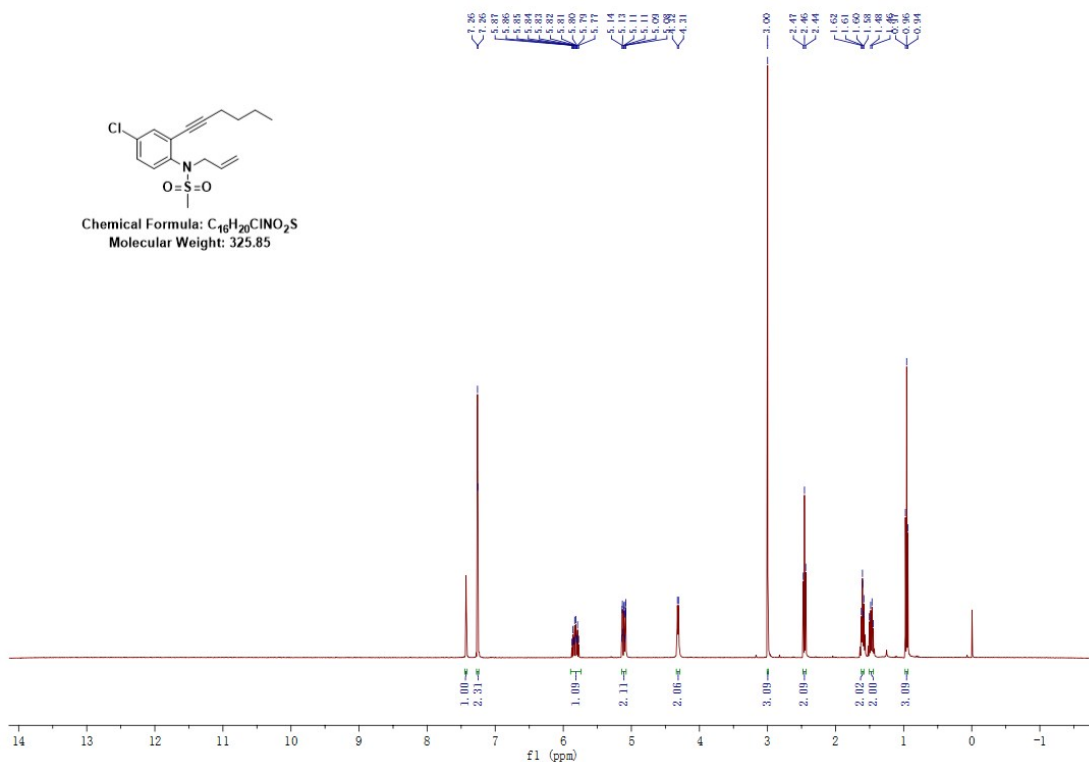

### *N*-Allyl-*N*-(5-bromo-2-(hex-1-yn-1-yl)phenyl)methanesulfonamide (**1l**)

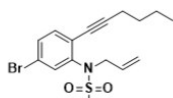

Chemical Formula: C<sub>16</sub>H<sub>20</sub>BrNO<sub>2</sub>S  
Molecular Weight: 370.30

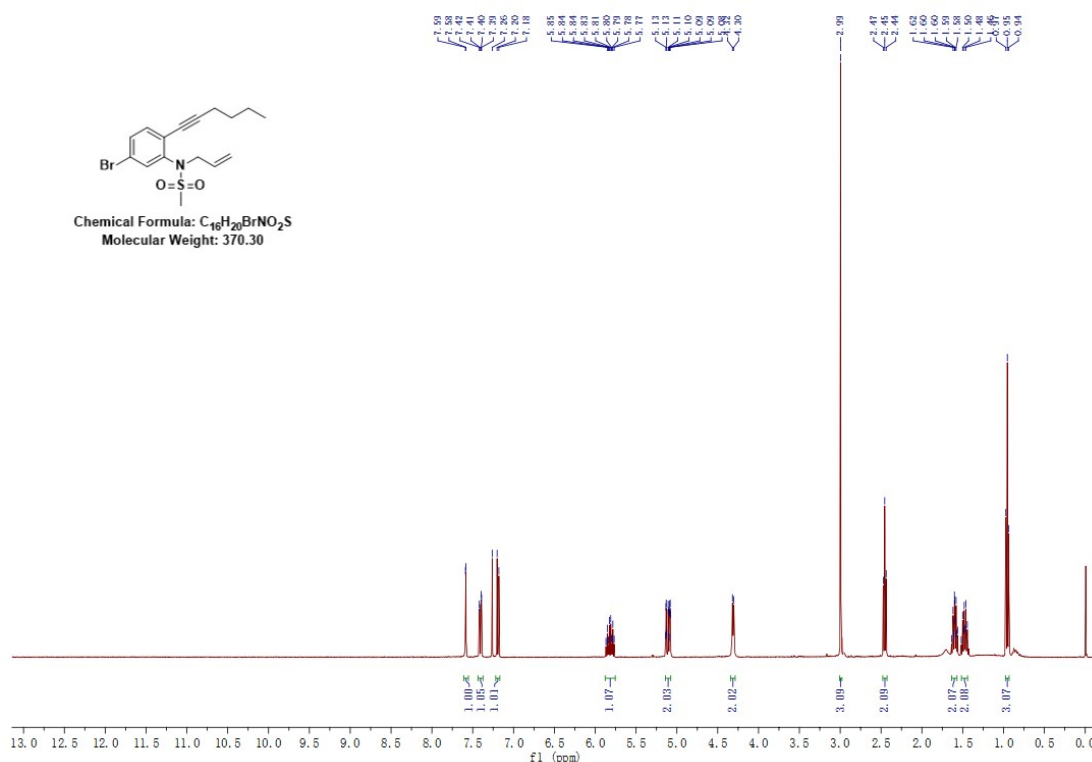

*N*-Allyl-*N*-(2-(hex-1-yn-1-yl)-5-methylphenyl)methanesulfonamide (**1m**)

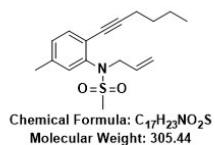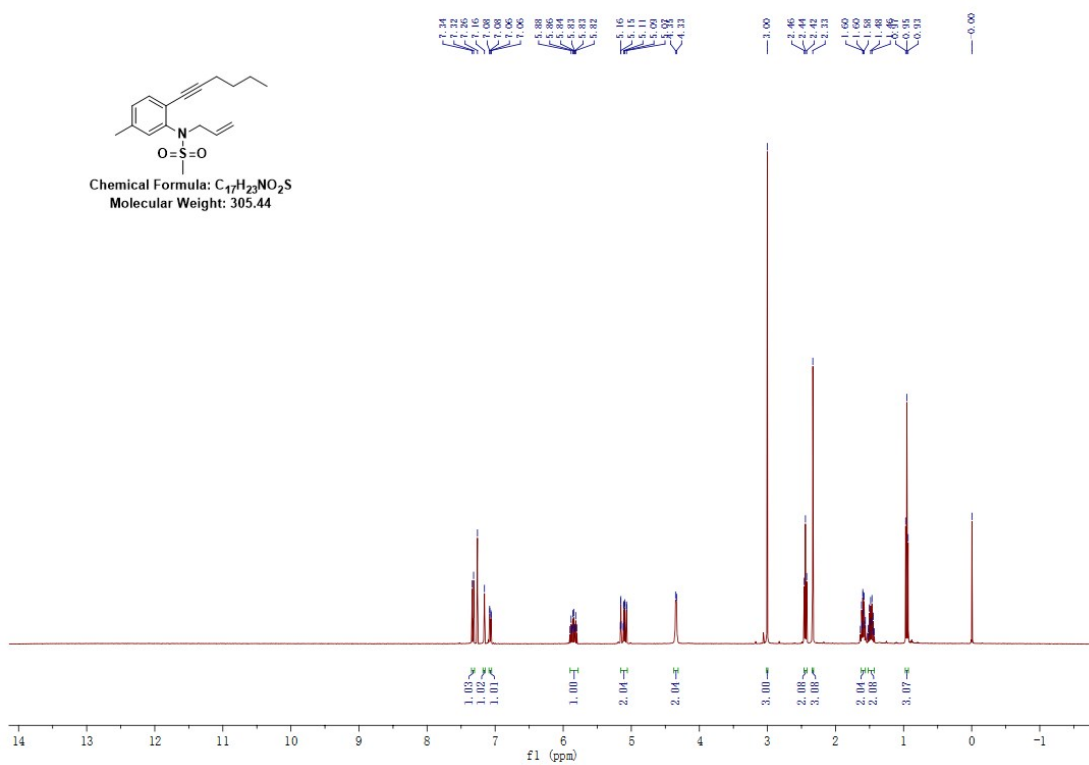

*N*-Allyl-*N*-(4-cyano-2-(hex-1-yn-1-yl)phenyl)methanesulfonamide (**1n**)

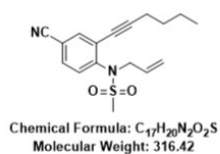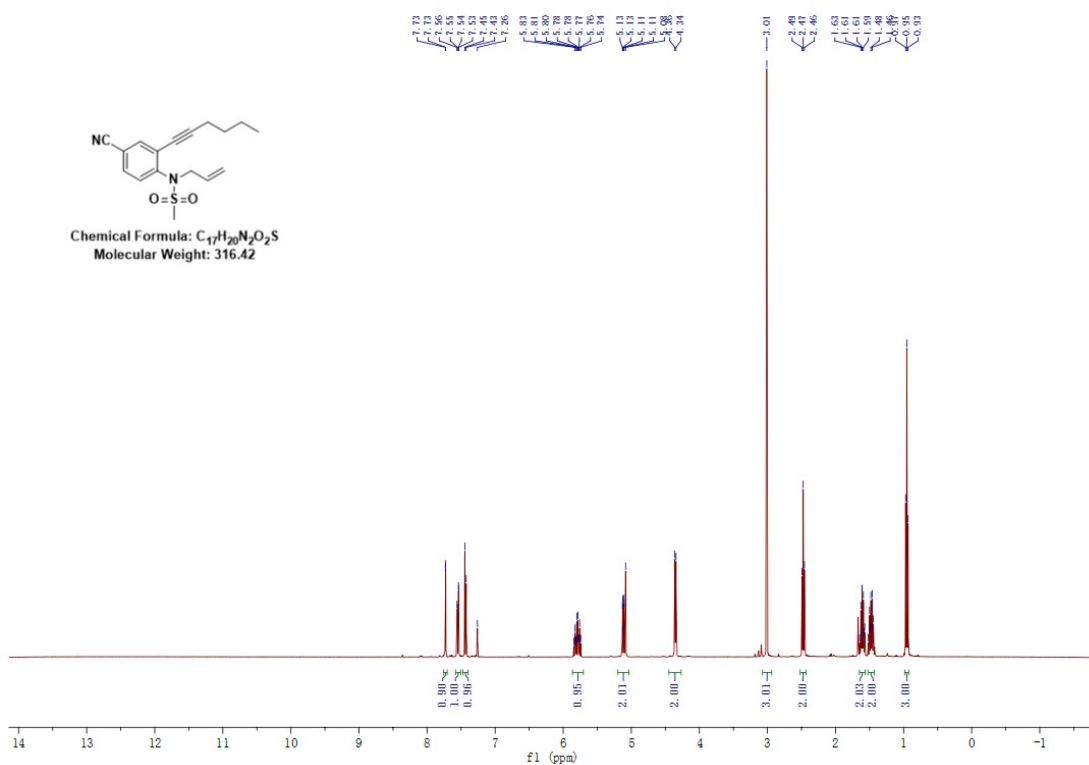

*N*-Allyl-*N*-(2-(hex-1-yn-1-yl)-4-(trifluoromethyl)phenyl)methanesulfonamide (**1o**)

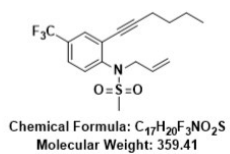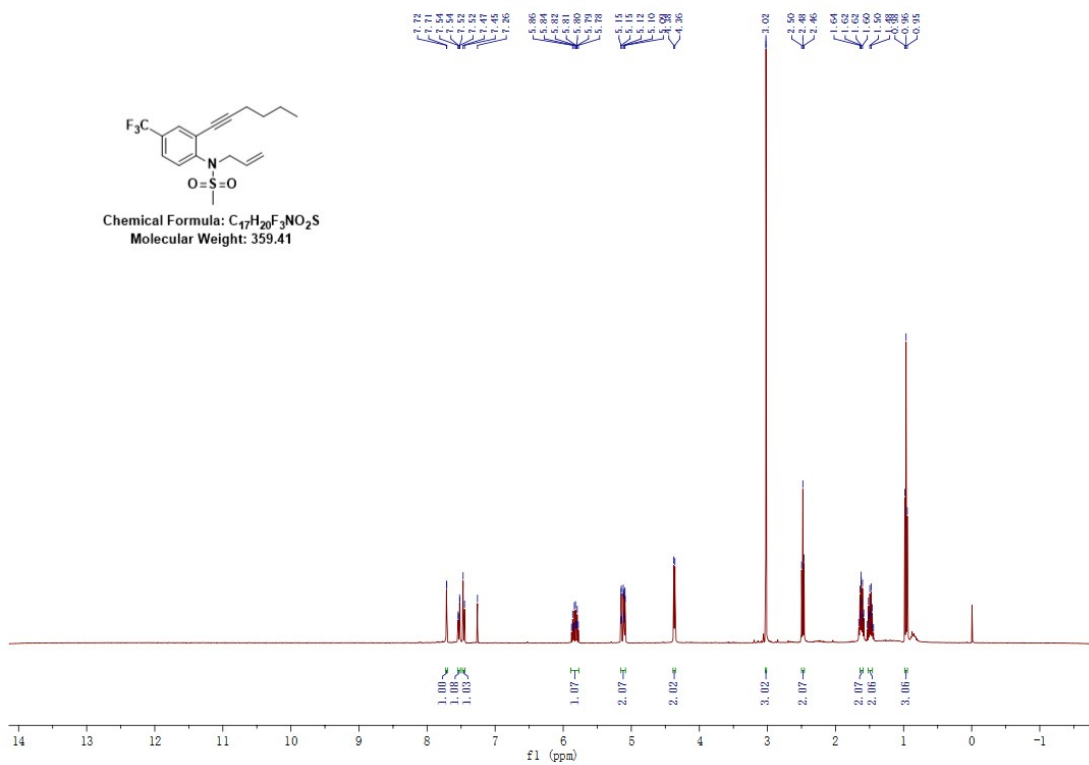

### 3-Allyl-2-butyl-1-(methylsulfonyl)-1H-indole (2a)

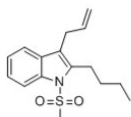

Chemical Formula: C<sub>18</sub>H<sub>21</sub>NO<sub>2</sub>S  
Molecular Weight: 291.41

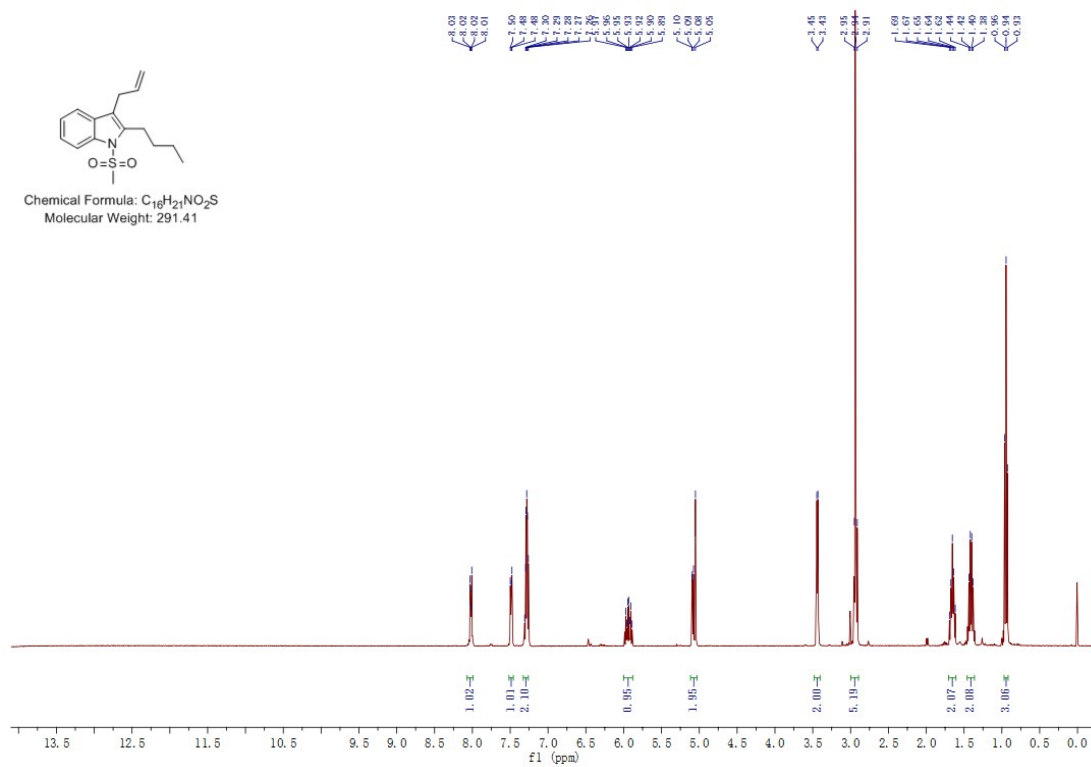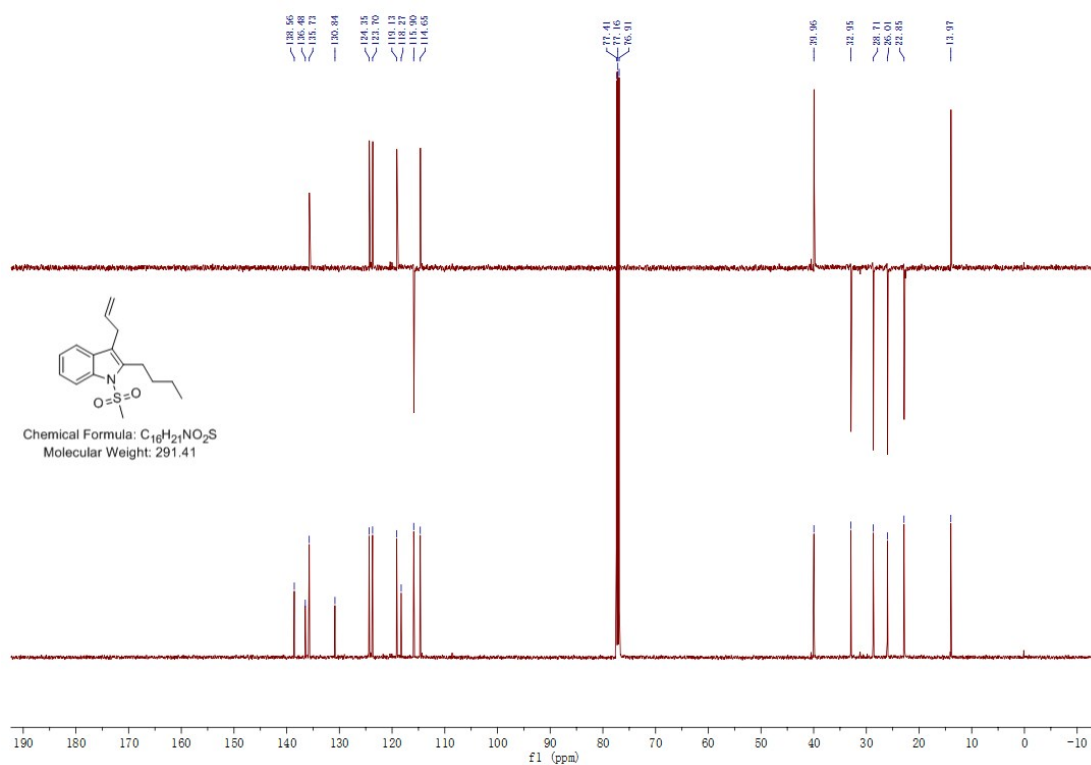



# 1-Allyl-2-butyl-3-(methylsulfonyl)-*1H*-indole (3a)

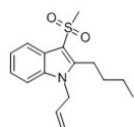

Chemical Formula:  $C_{18}H_{21}NO_2S$   
Molecular Weight: 291.41

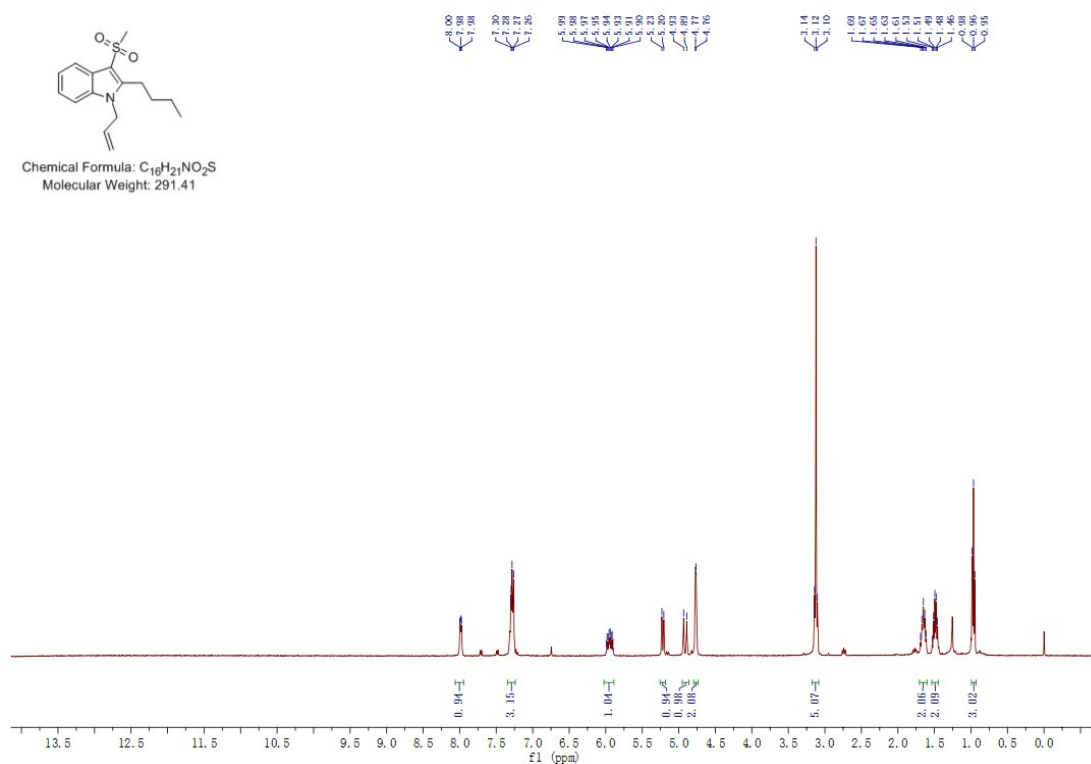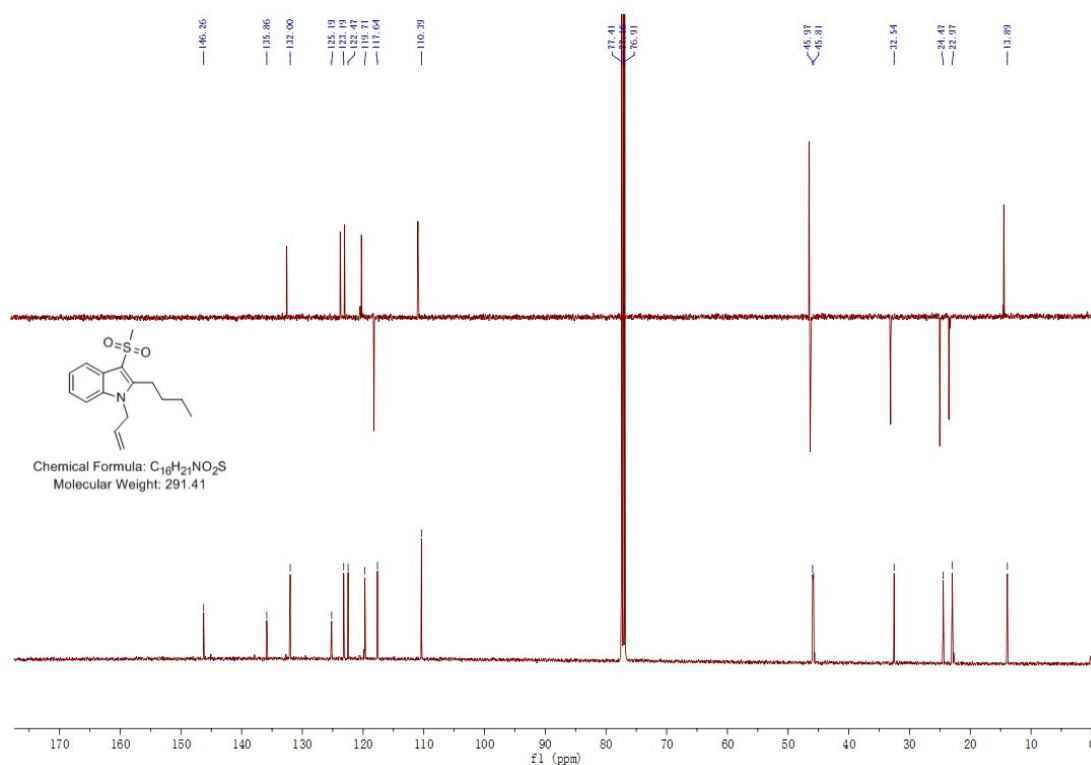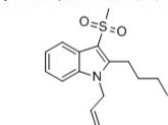

Chemical Formula:  $C_{18}H_{21}NO_2S$   
Molecular Weight: 291.41

### 3-Allyl-2-cyclopropyl-1-(methylsulfonyl)-1H-indole (2b)

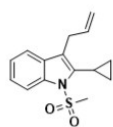

Chemical Formula: C<sub>15</sub>H<sub>17</sub>NO<sub>2</sub>S  
Molecular Weight: 275.37

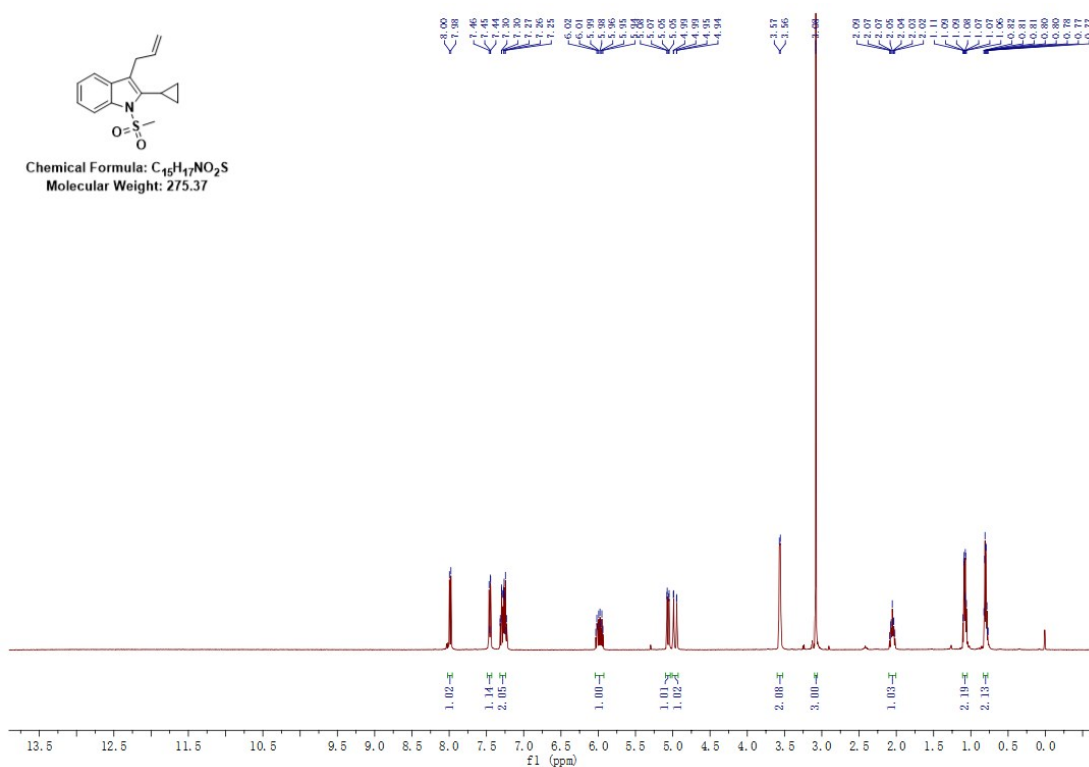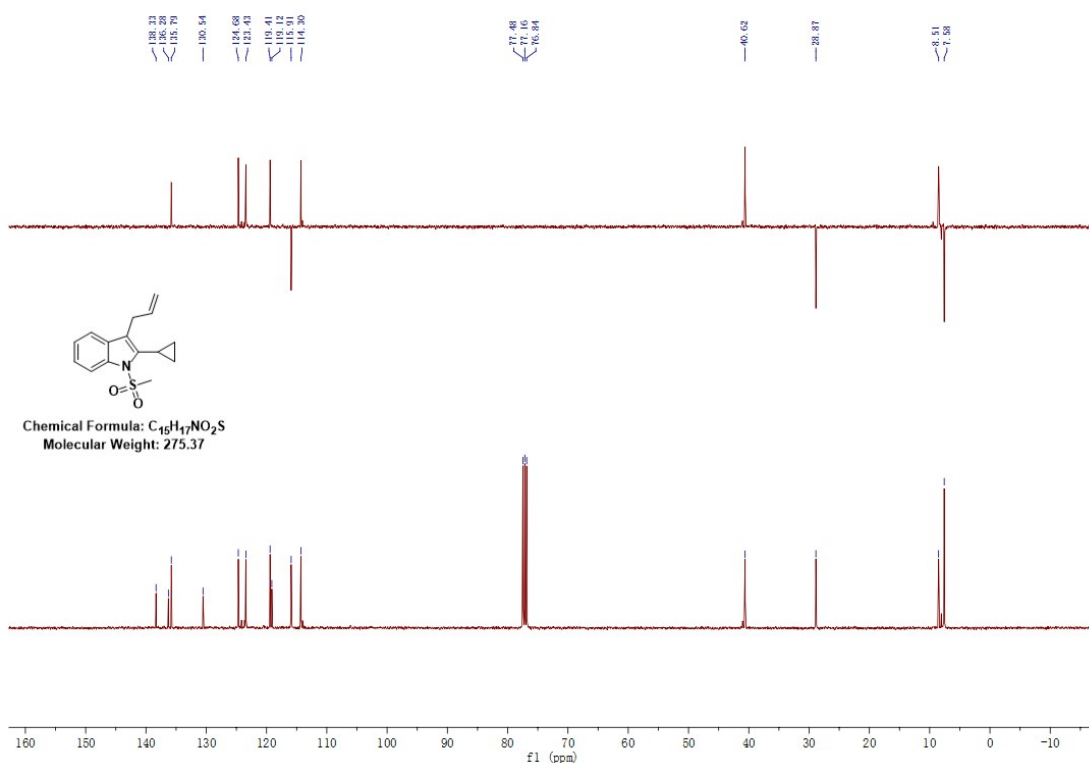

# 1-Allyl-2-cyclopropyl-3-(methylsulfonyl)-1H-indole (3b)

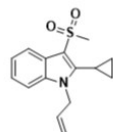

Chemical Formula: C<sub>15</sub>H<sub>17</sub>NO<sub>2</sub>S  
Molecular Weight: 275.37

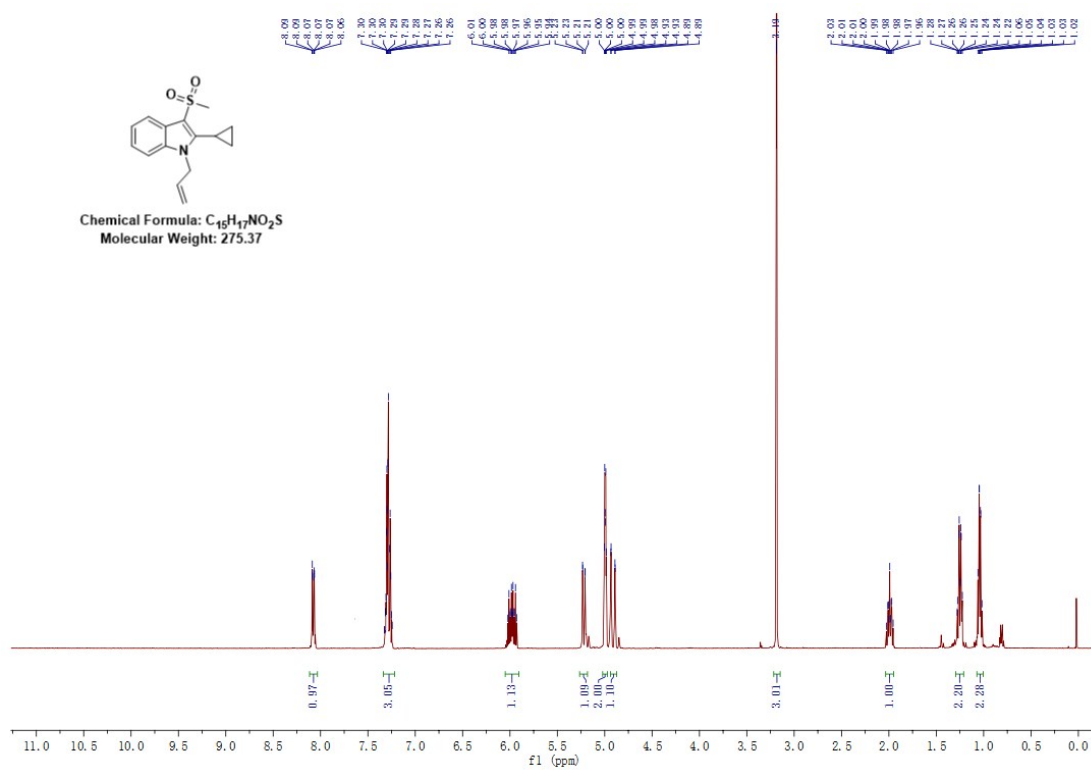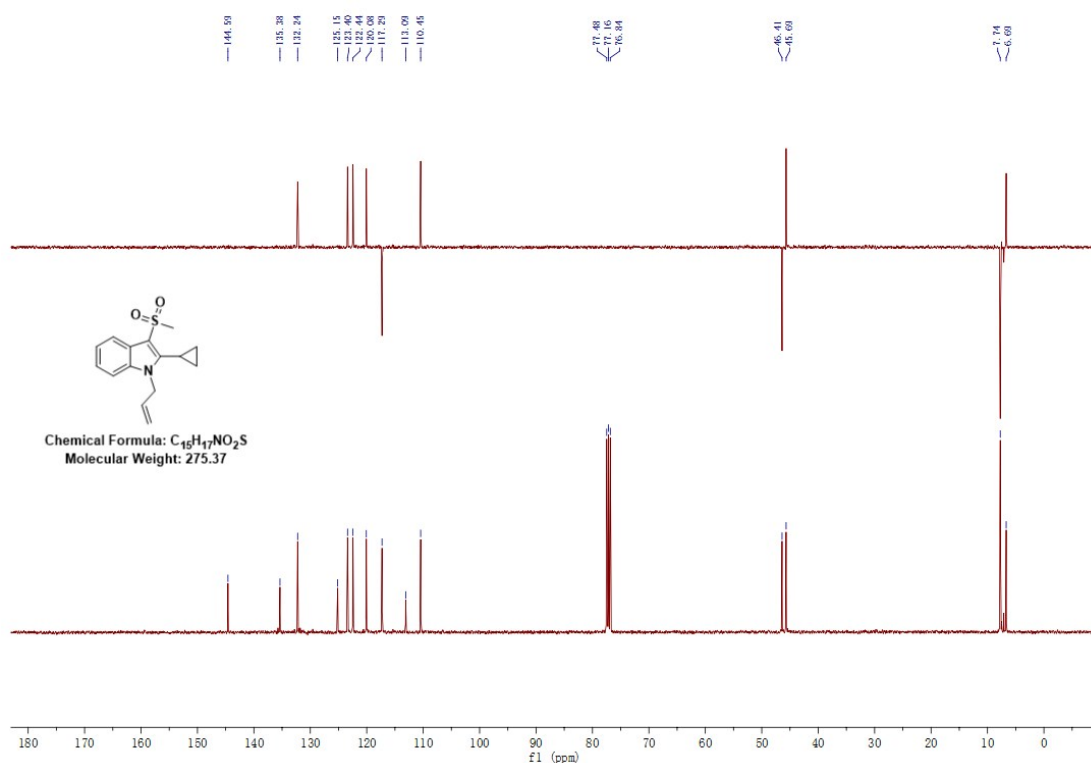

### 3-Allyl-2-cyclohexyl-1-(methylsulfonyl)-1H-indole (2c)

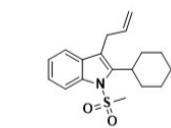

Chemical Formula: C<sub>18</sub>H<sub>23</sub>NO<sub>2</sub>S  
Molecular Weight: 317.45

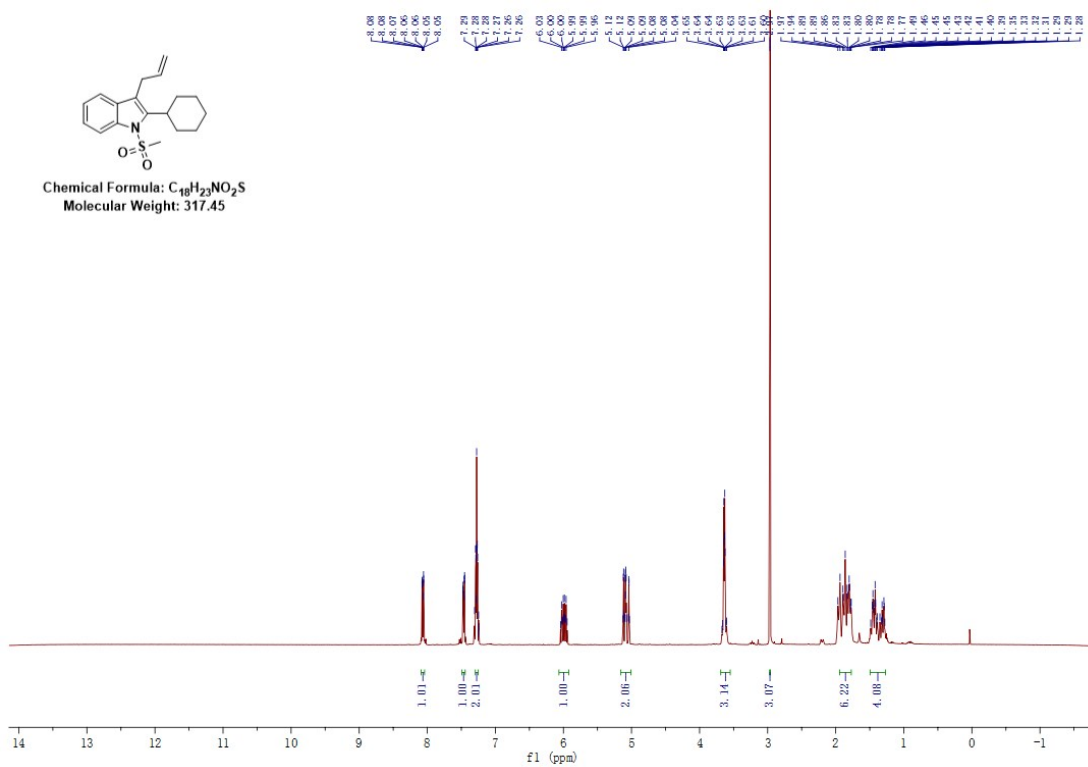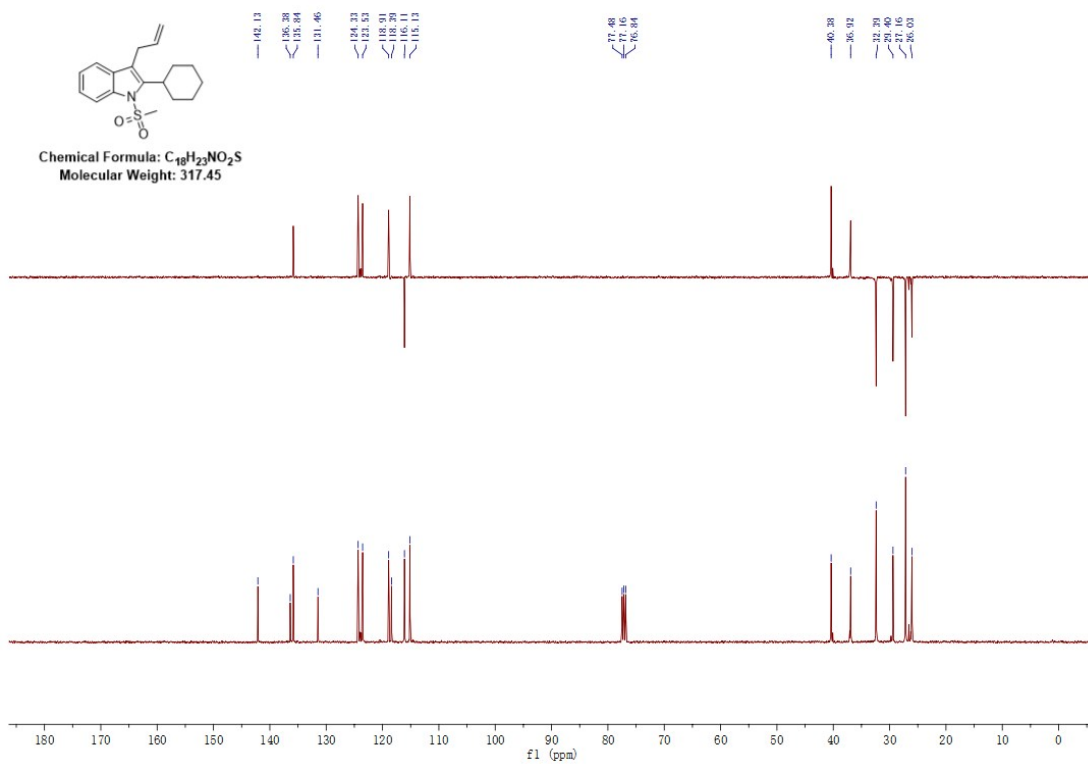

# 1-Allyl-2-cyclohexyl-3-(methylsulfonyl)-1*H*-indole (3c)

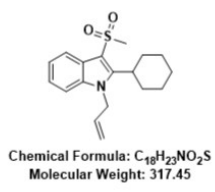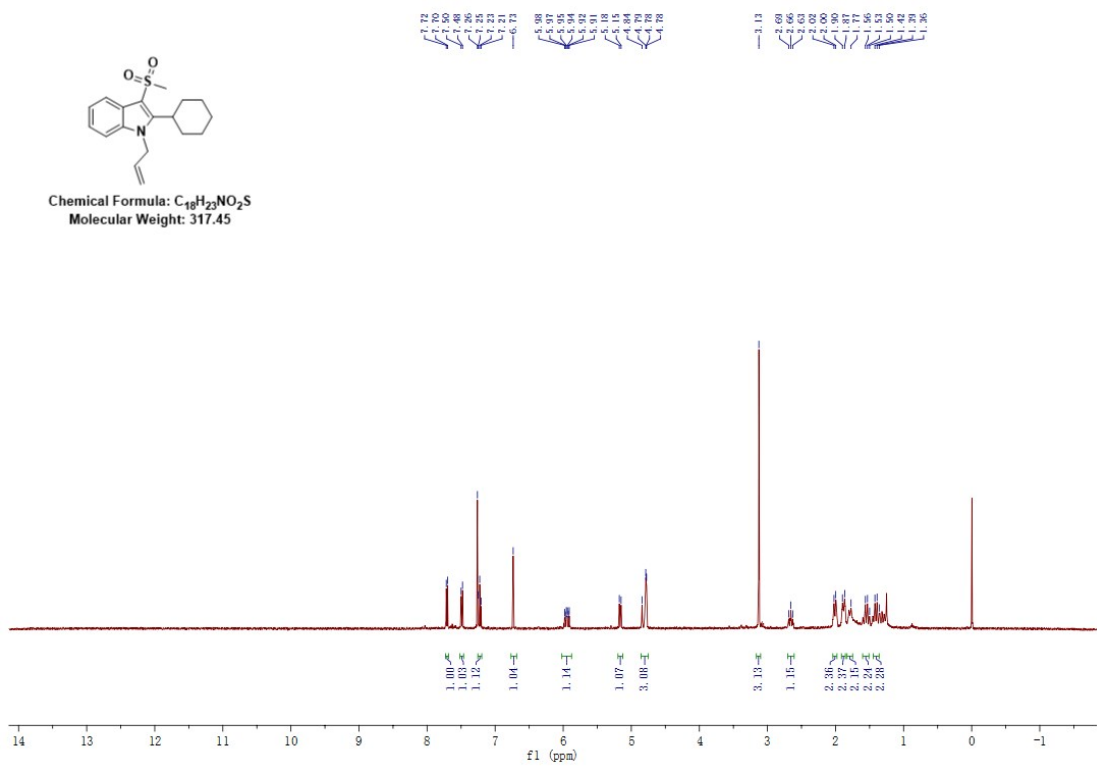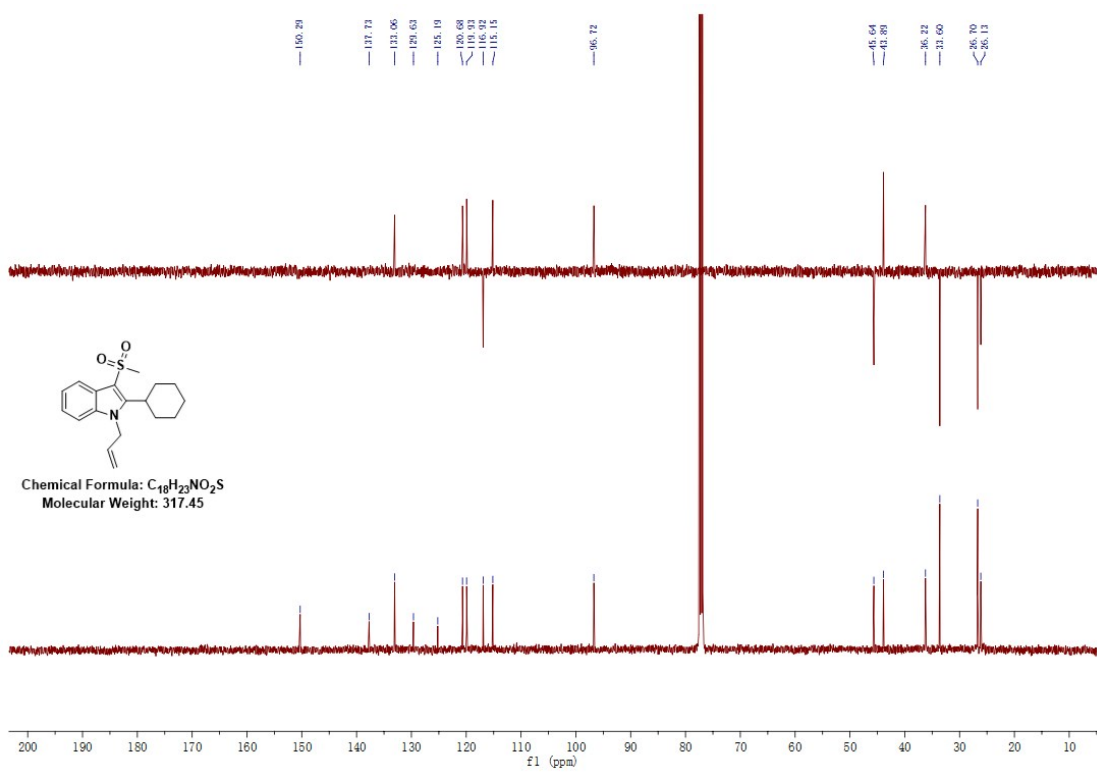

### 3-Allyl-1-(methylsulfonyl)-2-phenyl-1H-indole (2d)

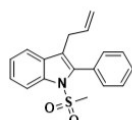

Chemical Formula: C<sub>18</sub>H<sub>17</sub>NO<sub>2</sub>S  
Molecular Weight: 311.40

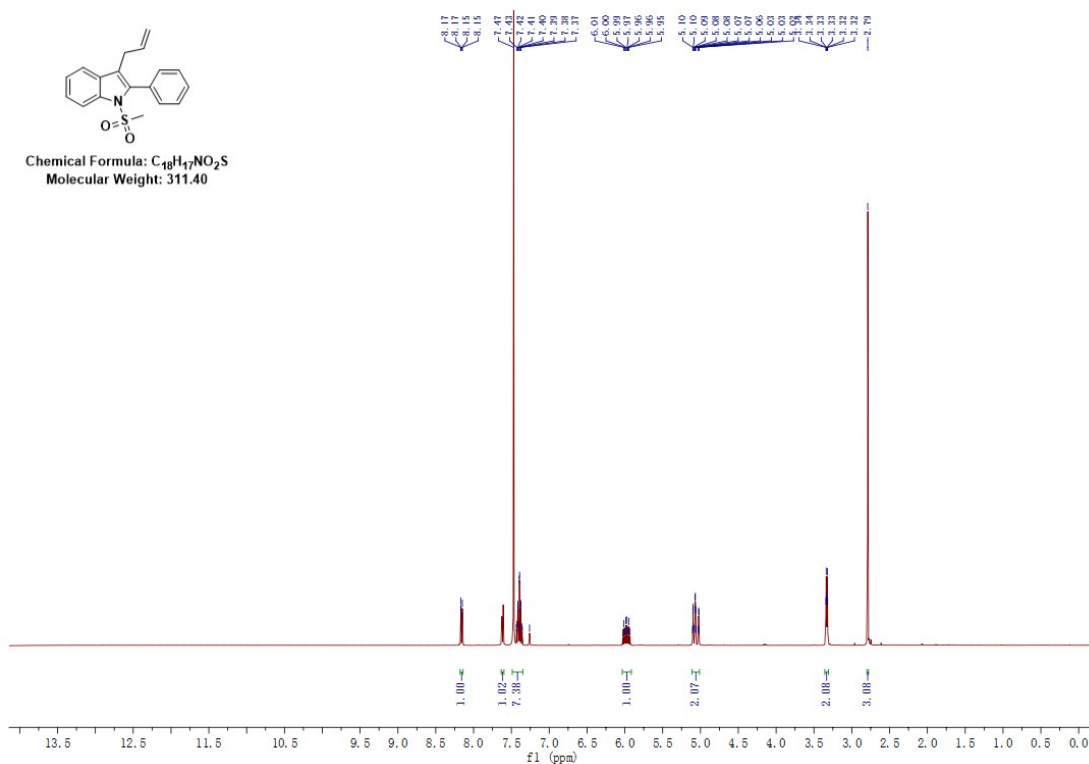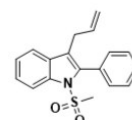

Chemical Formula: C<sub>18</sub>H<sub>17</sub>NO<sub>2</sub>S  
Molecular Weight: 311.40

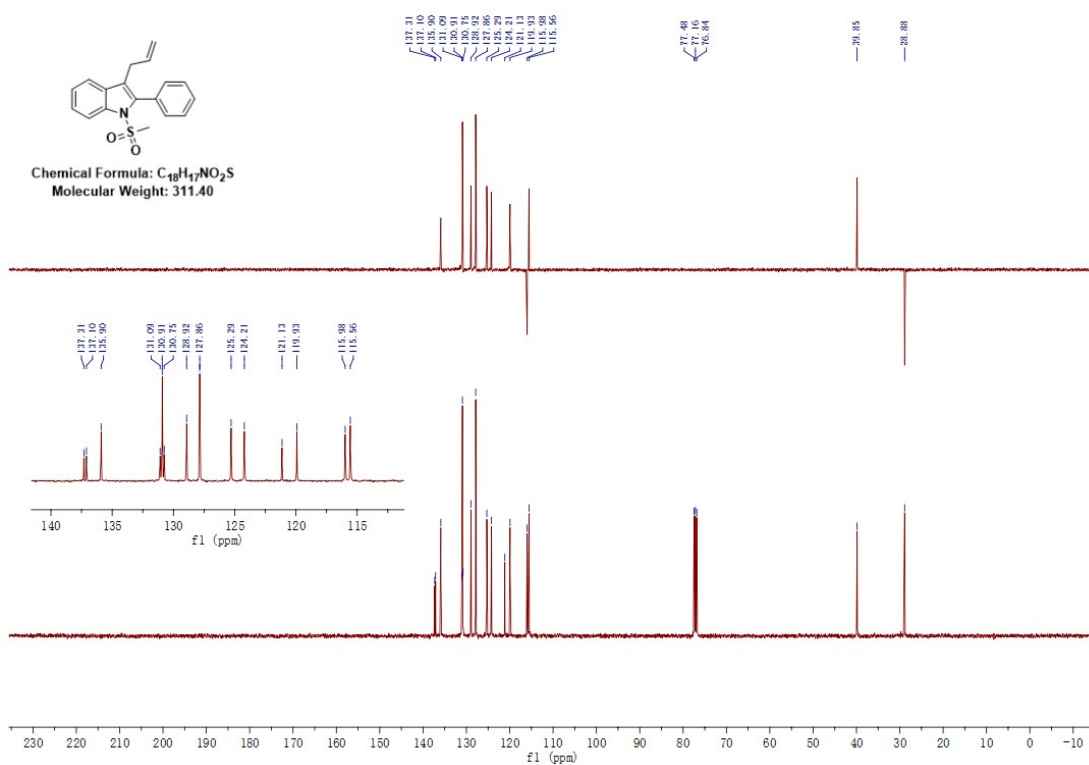

# 1-Allyl-3-(methylsulfonyl)-2-phenyl-1H-indole (3d)

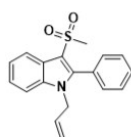

Chemical Formula: C<sub>18</sub>H<sub>17</sub>NO<sub>2</sub>S  
Molecular Weight: 311.40

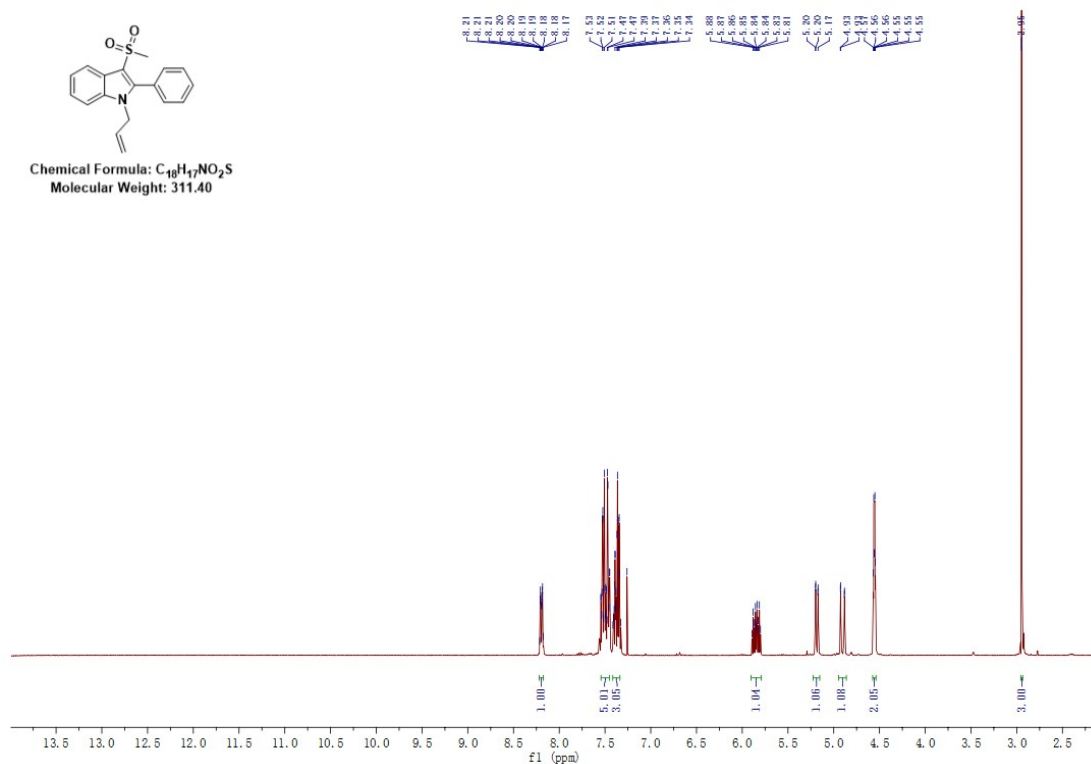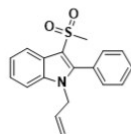

Chemical Formula: C<sub>18</sub>H<sub>17</sub>NO<sub>2</sub>S  
Molecular Weight: 311.40

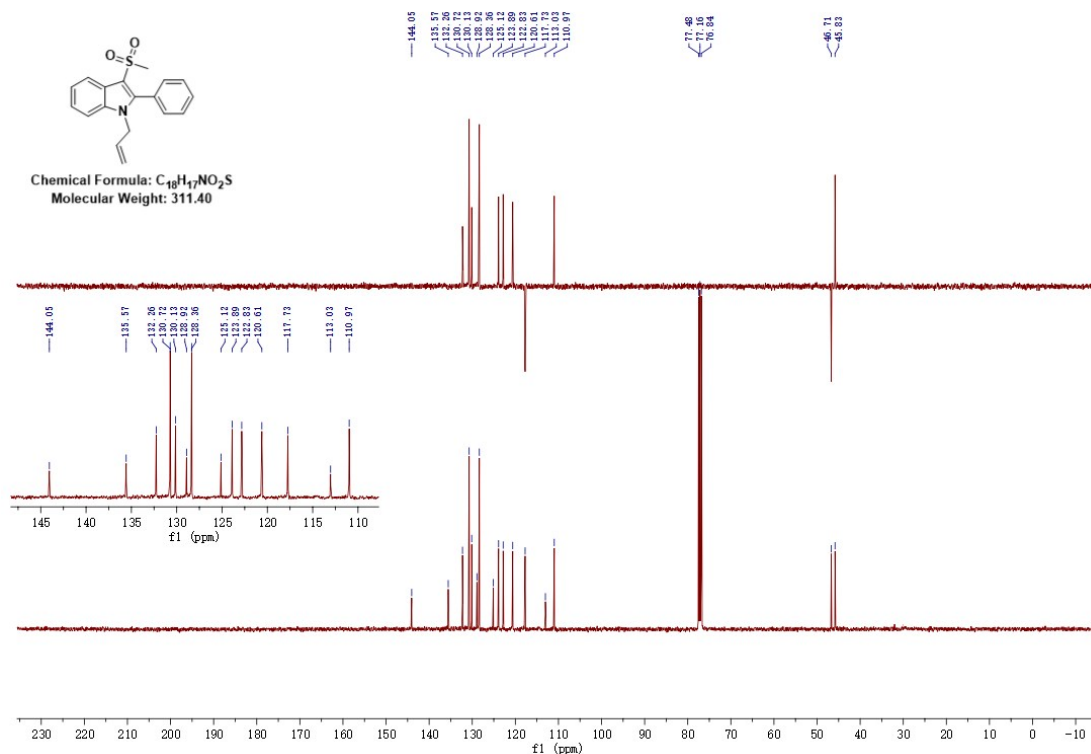

### 3-(3-Allyl-1-(methylsulfonyl)-1*H*-indol-2-yl)propyl acetate (**2e**)

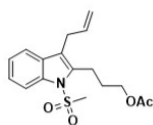

Chemical Formula: C<sub>17</sub>H<sub>21</sub>NO<sub>4</sub>S  
Molecular Weight: 335.42

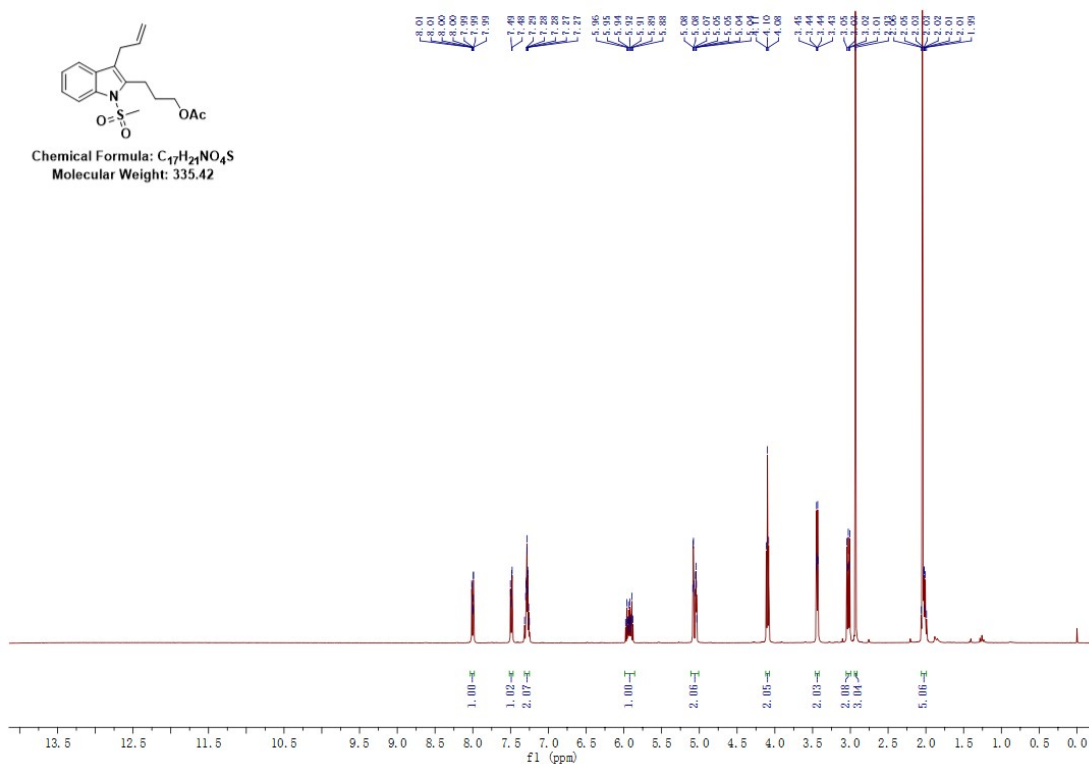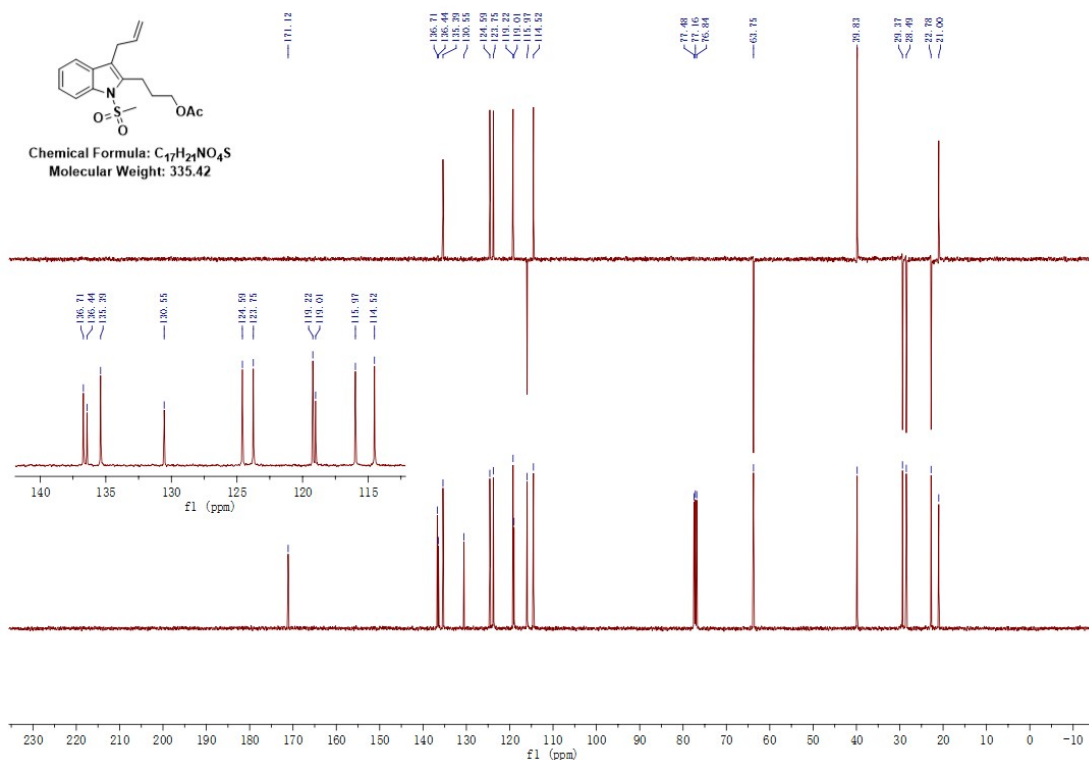





### 3-Allyl-2-(3-chloropropyl)-1-(methylsulfonyl)-1H-indole (2f)

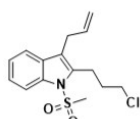

Chemical Formula: C<sub>15</sub>H<sub>18</sub>ClNO<sub>2</sub>S  
Molecular Weight: 311.83

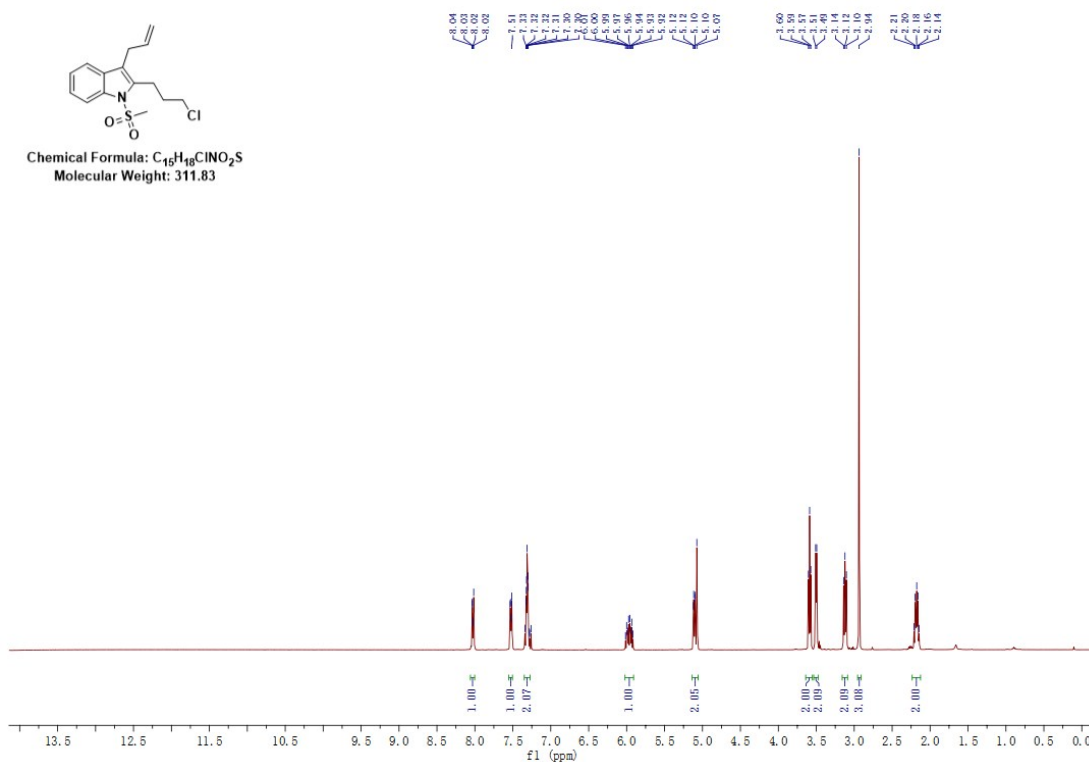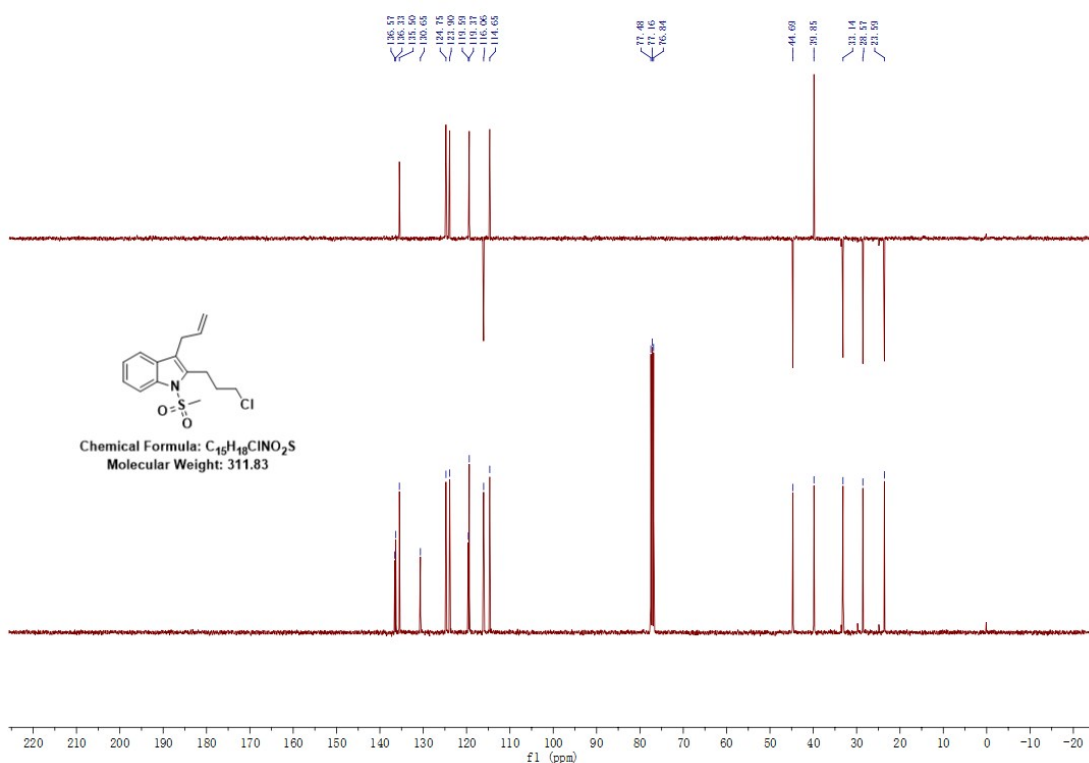

Chemical Formula: C<sub>15</sub>H<sub>18</sub>ClNO<sub>2</sub>S  
Molecular Weight: 311.83

# 1-Allyl-2-(3-chloropropyl)-3-(methylsulfonyl)-*1H*-indole (**3f**)

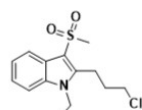

Chemical Formula:  $C_{15}H_{18}ClNO_2S$   
Molecular Weight: 311.83

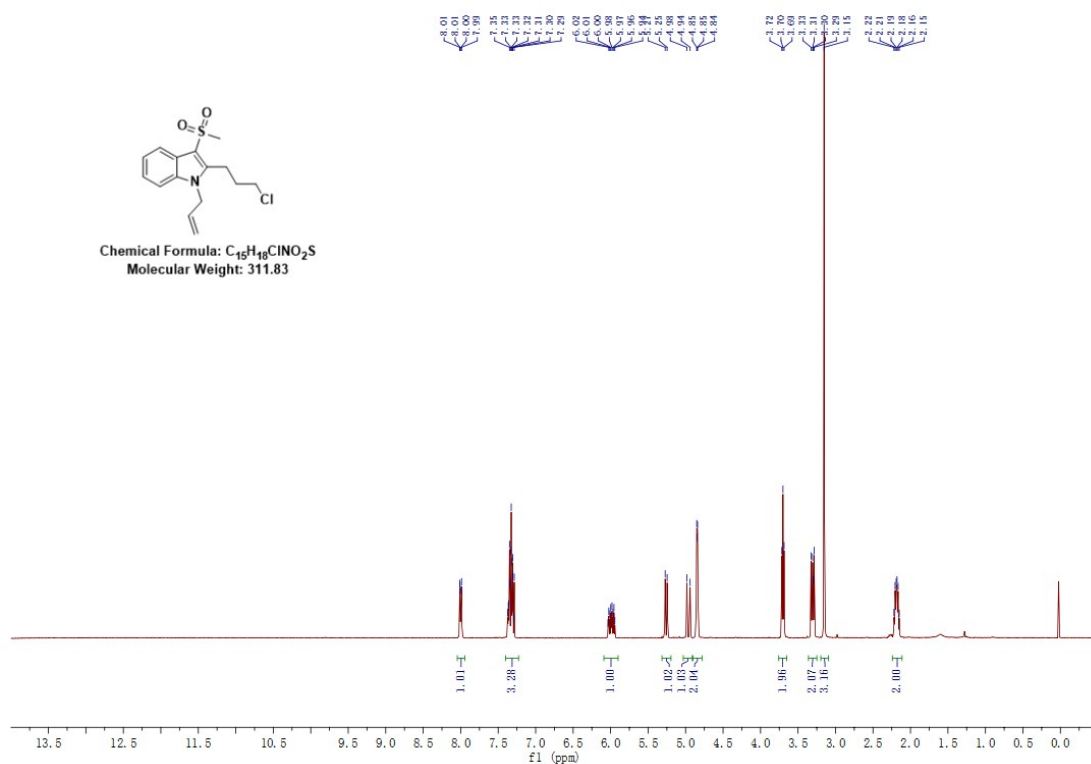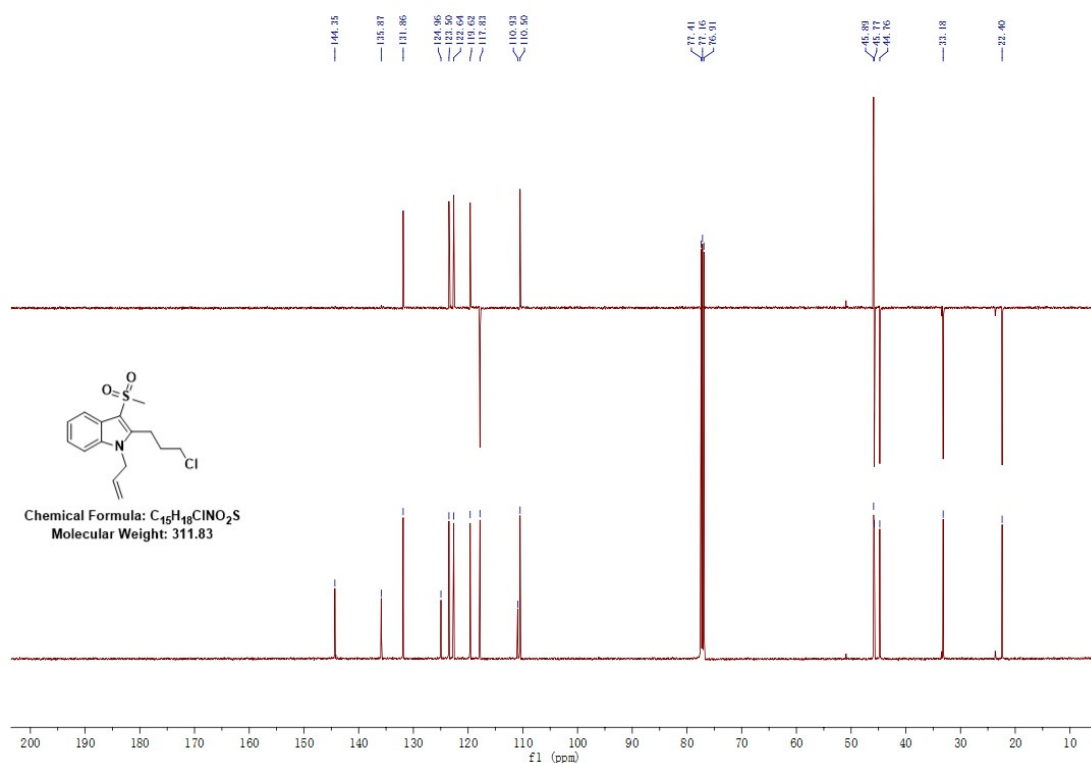

Chemical Formula:  $C_{15}H_{18}ClNO_2S$   
Molecular Weight: 311.83

### 3-Allyl-2-butyl-1-(ethylsulfonyl)-*1H*-indole (2g)

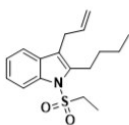

Chemical Formula: C<sub>17</sub>H<sub>23</sub>NO<sub>2</sub>S  
Molecular Weight: 305.44

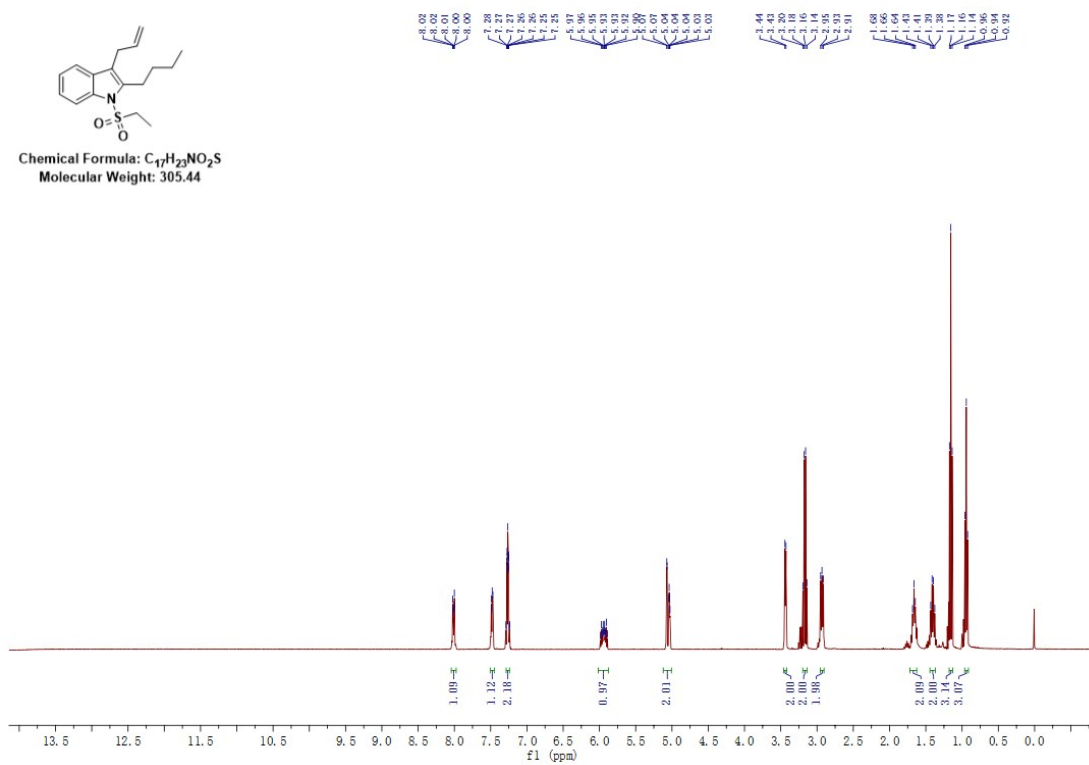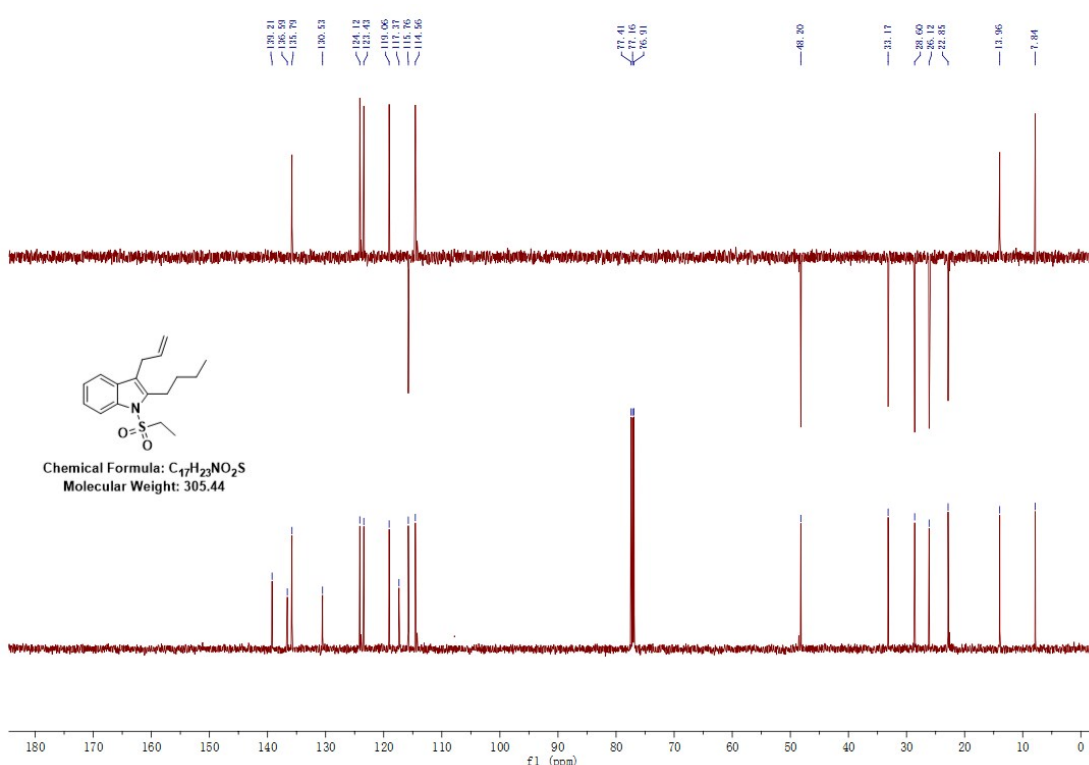

# 1-Allyl-2-butyl-3-(ethylsulfonyl)-1*H*-indole (**3g**)

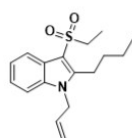

Chemical Formula: C<sub>17</sub>H<sub>23</sub>NO<sub>2</sub>S  
Molecular Weight: 305.44

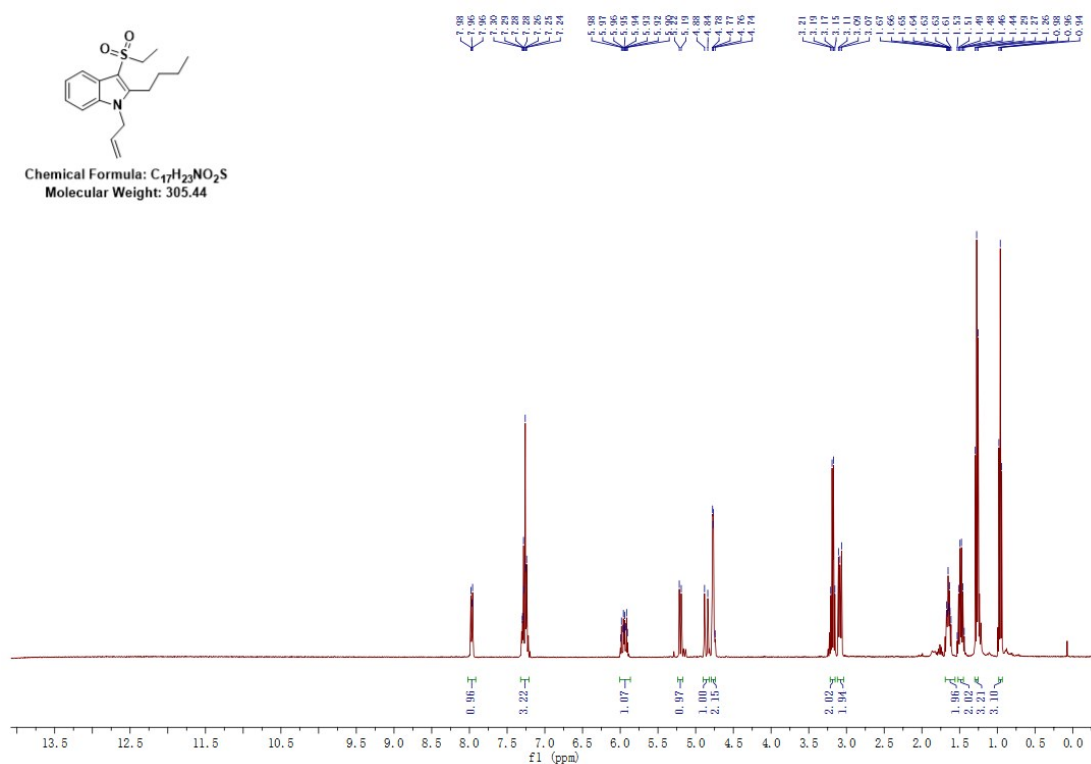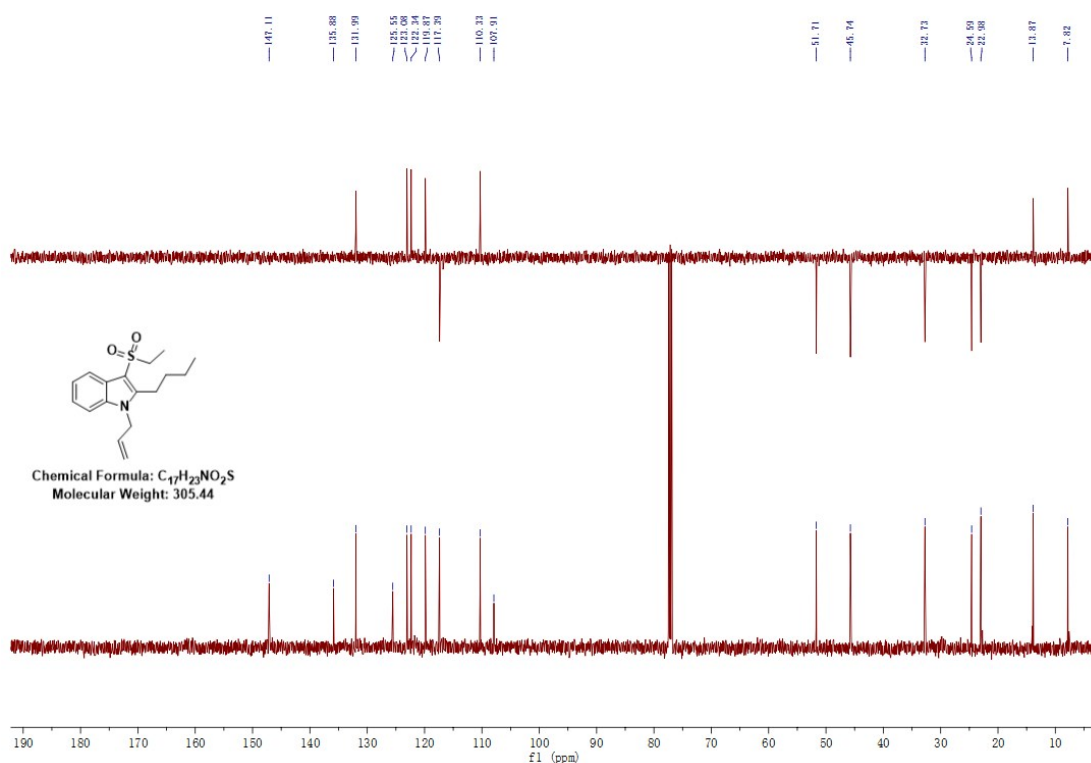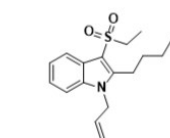

Chemical Formula: C<sub>17</sub>H<sub>23</sub>NO<sub>2</sub>S  
Molecular Weight: 305.44

### 3-Allyl-2-butyl-1-(phenylsulfonyl)-1H-indole (2h)

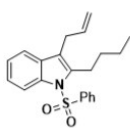

Chemical Formula:  $C_{21}H_{23}NO_2S$   
Molecular Weight: 353.48

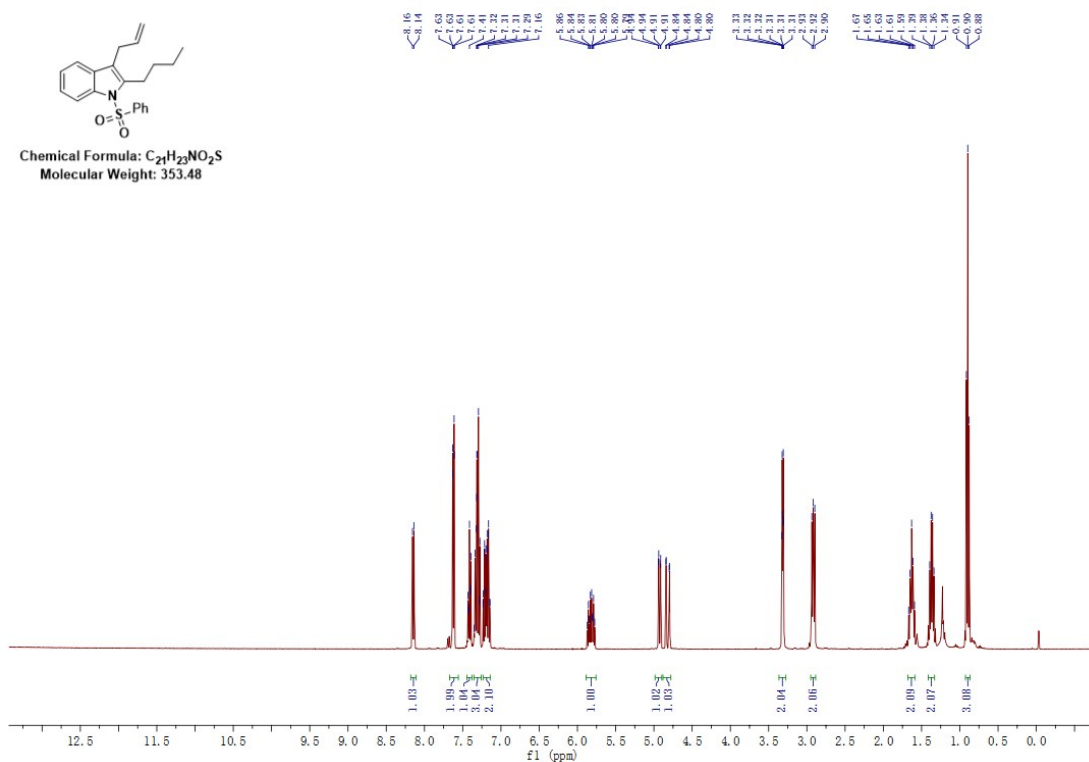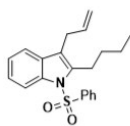

Chemical Formula:  $C_{21}H_{23}NO_2S$   
Molecular Weight: 353.48

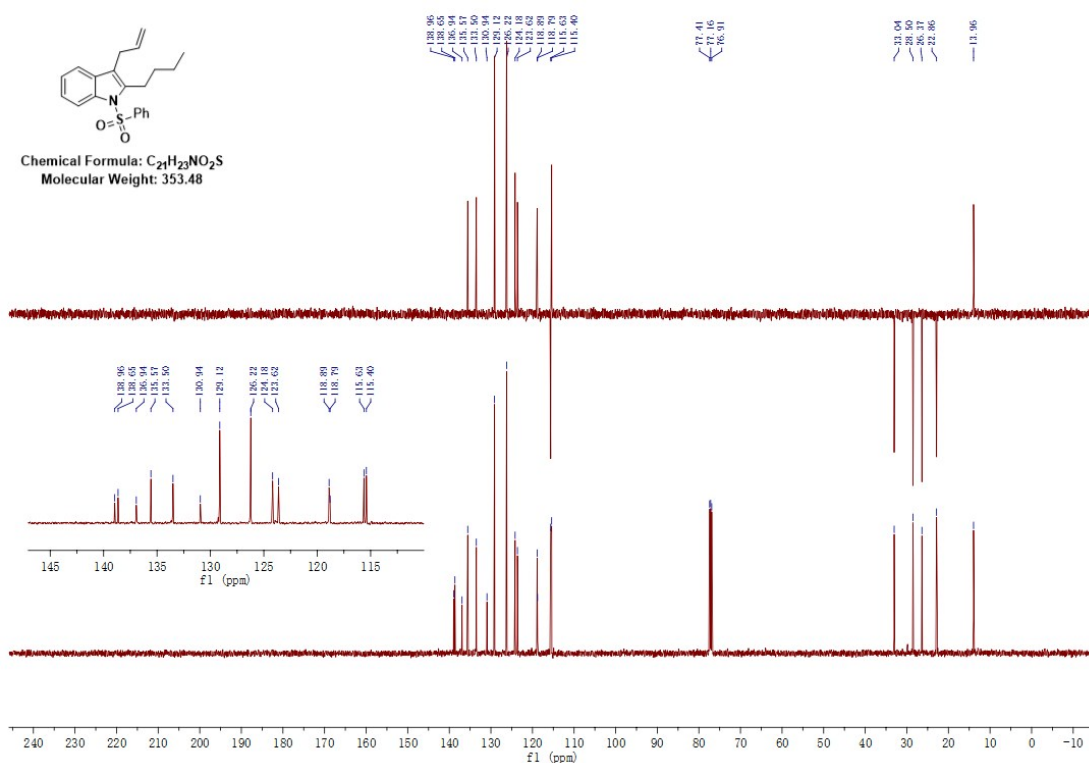



### 3-Allyl-2-butyl-1-(tosylsulfonyl)-*1H*-indole (**2i**)

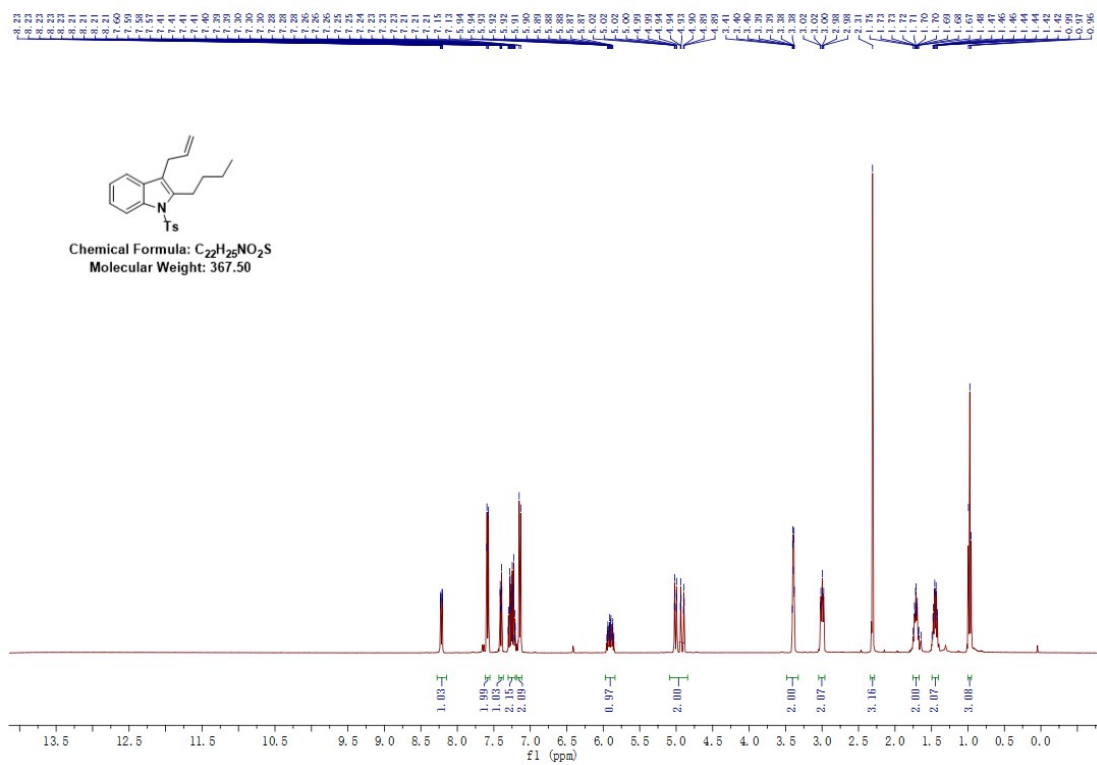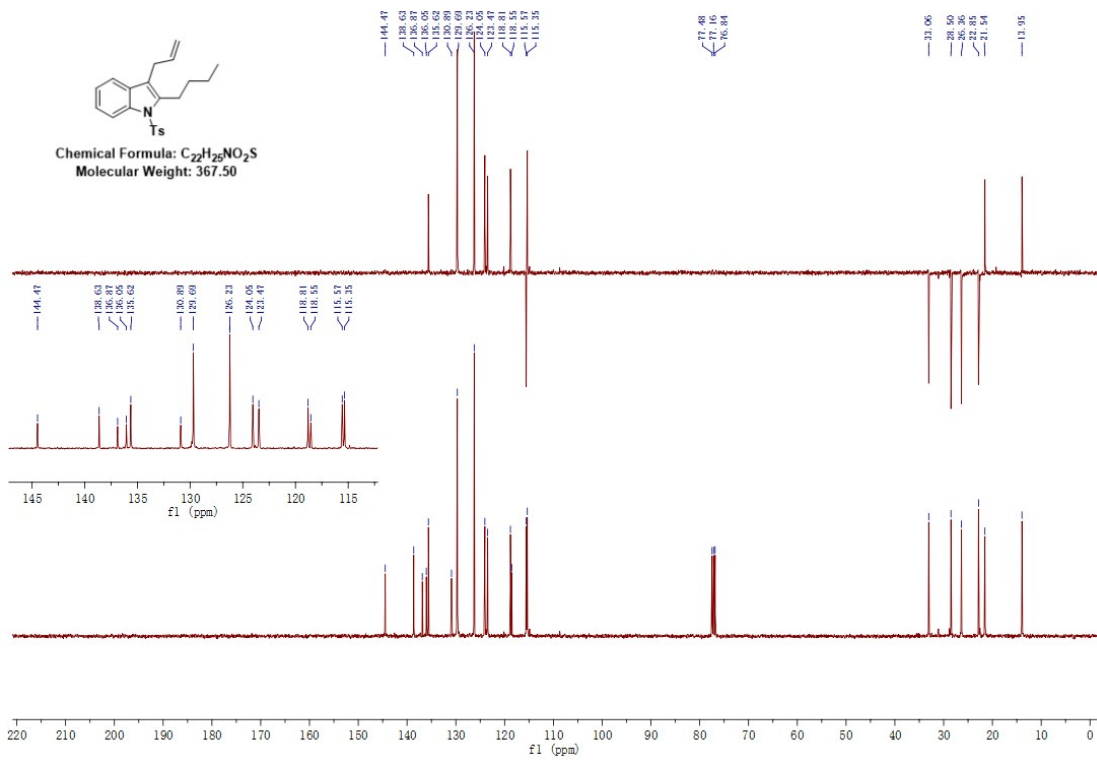



# 1-Allyl-2-butyl-3-(tosylsulfonyl)-*1H*-indole (3i)

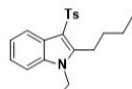

Chemical Formula: C<sub>22</sub>H<sub>25</sub>NO<sub>2</sub>S  
Molecular Weight: 367.50

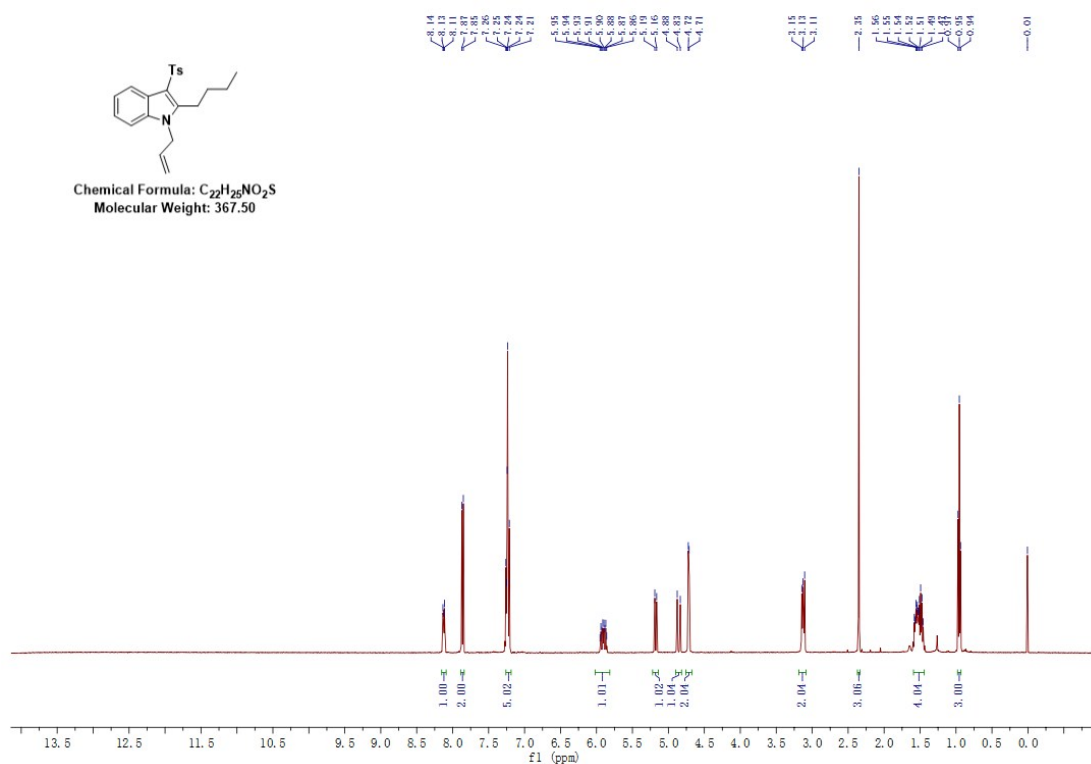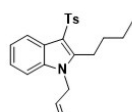

Chemical Formula: C<sub>22</sub>H<sub>25</sub>NO<sub>2</sub>S  
Molecular Weight: 367.50

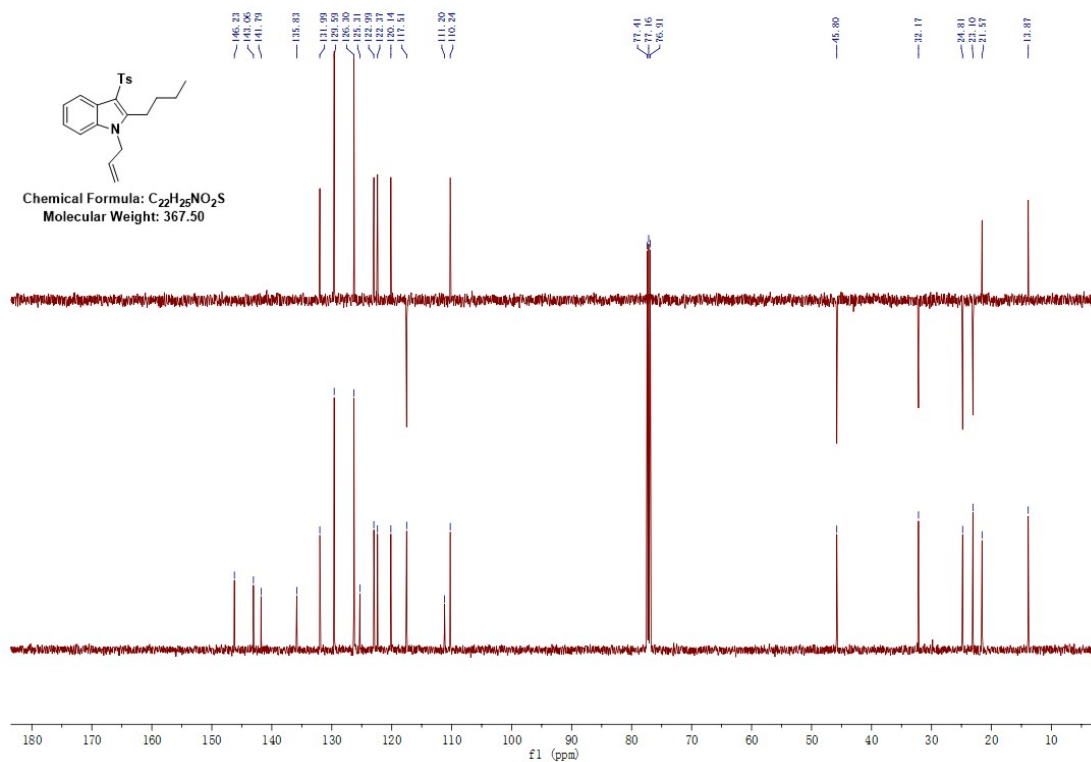

### 3-Allyl-2-butyl-5-fluoro-1-(methylsulfonyl)-*1H*-indole (2j)

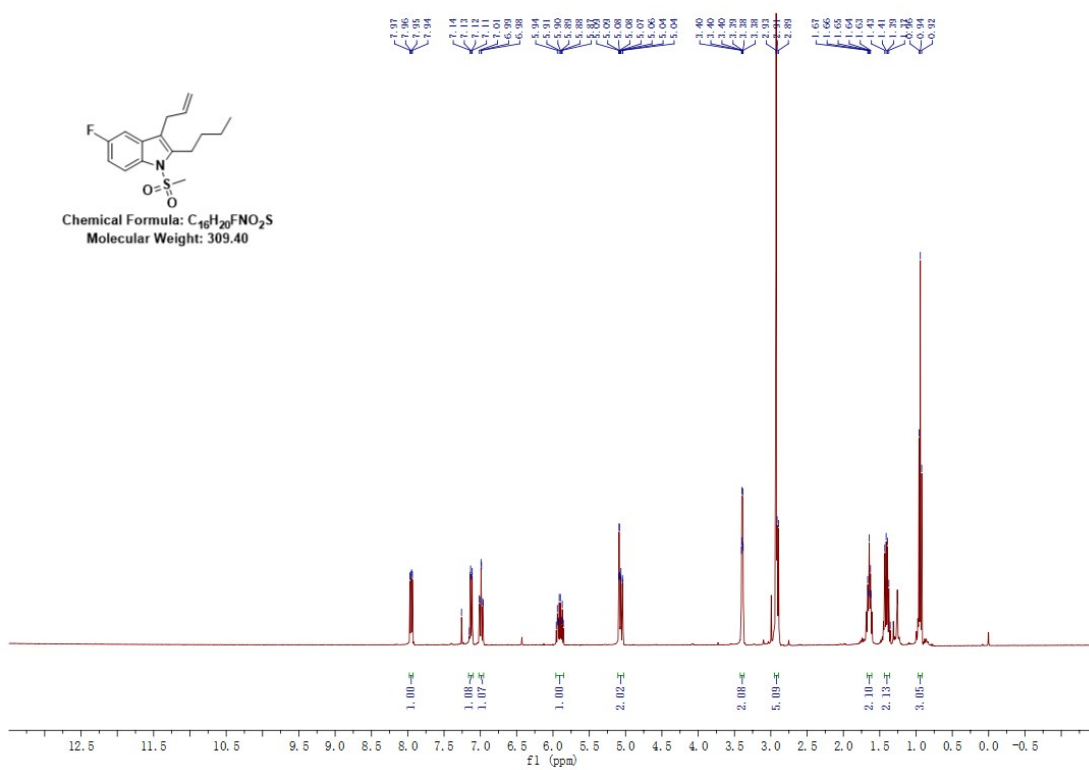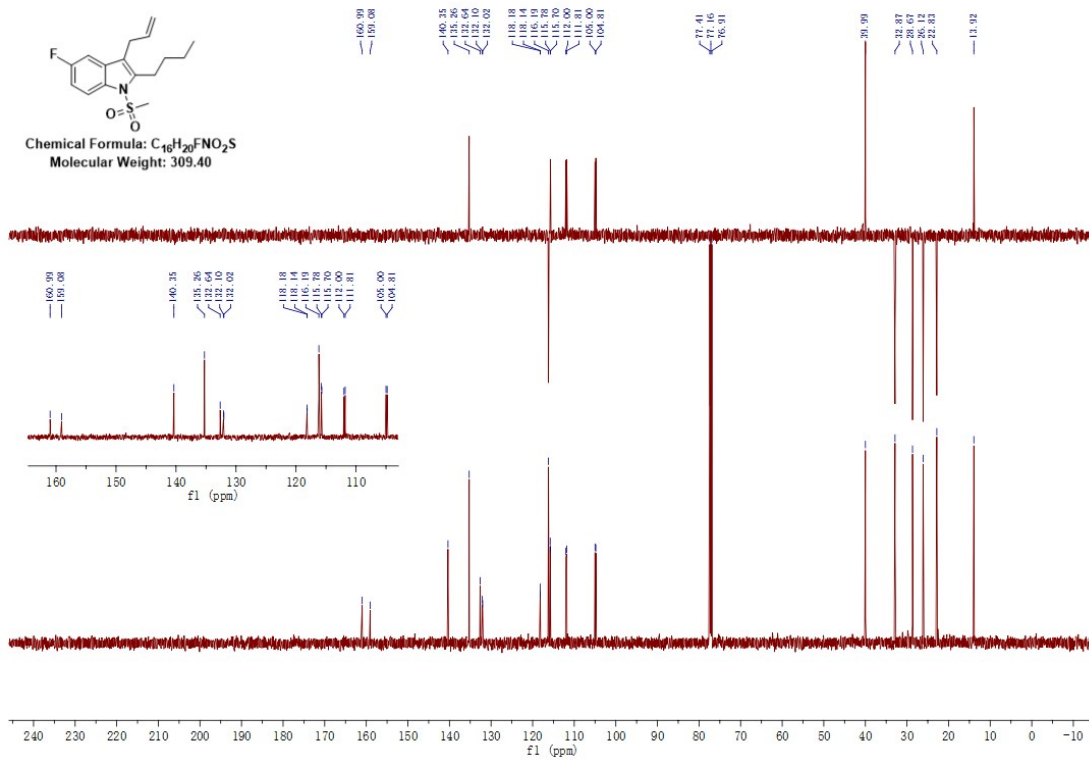

# 1-Allyl-2-butyl-5-fluoro-3-(methylsulfonyl)-1H-indole (3j)

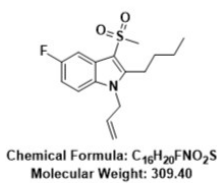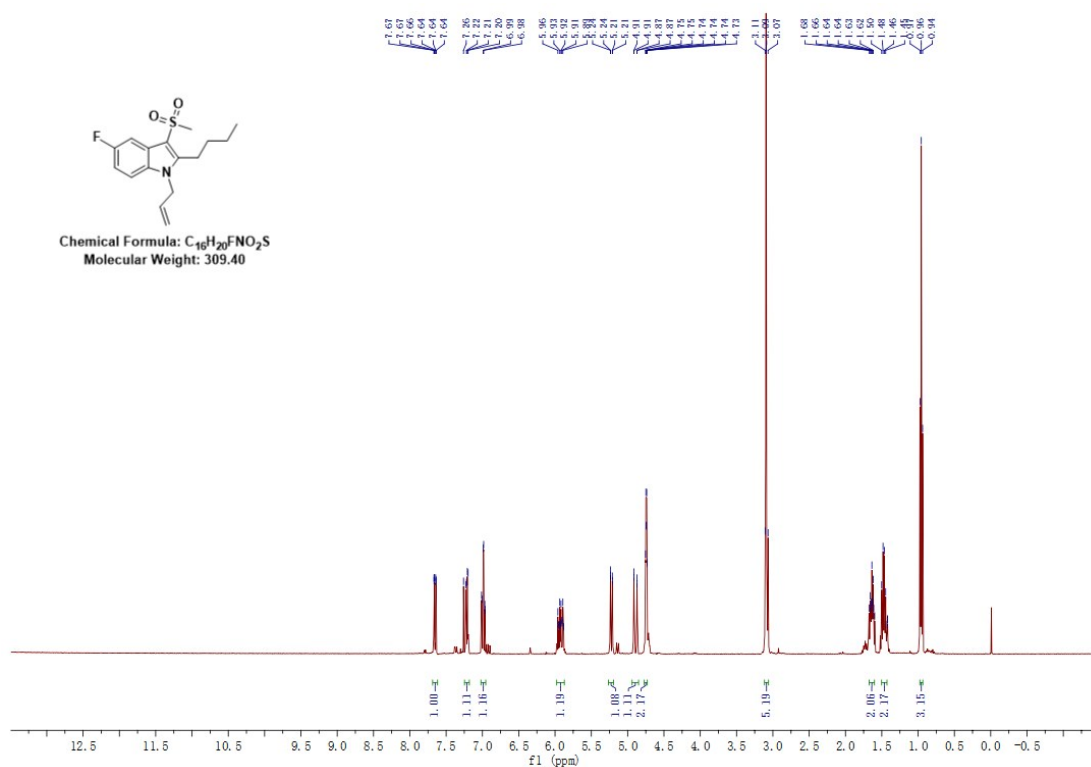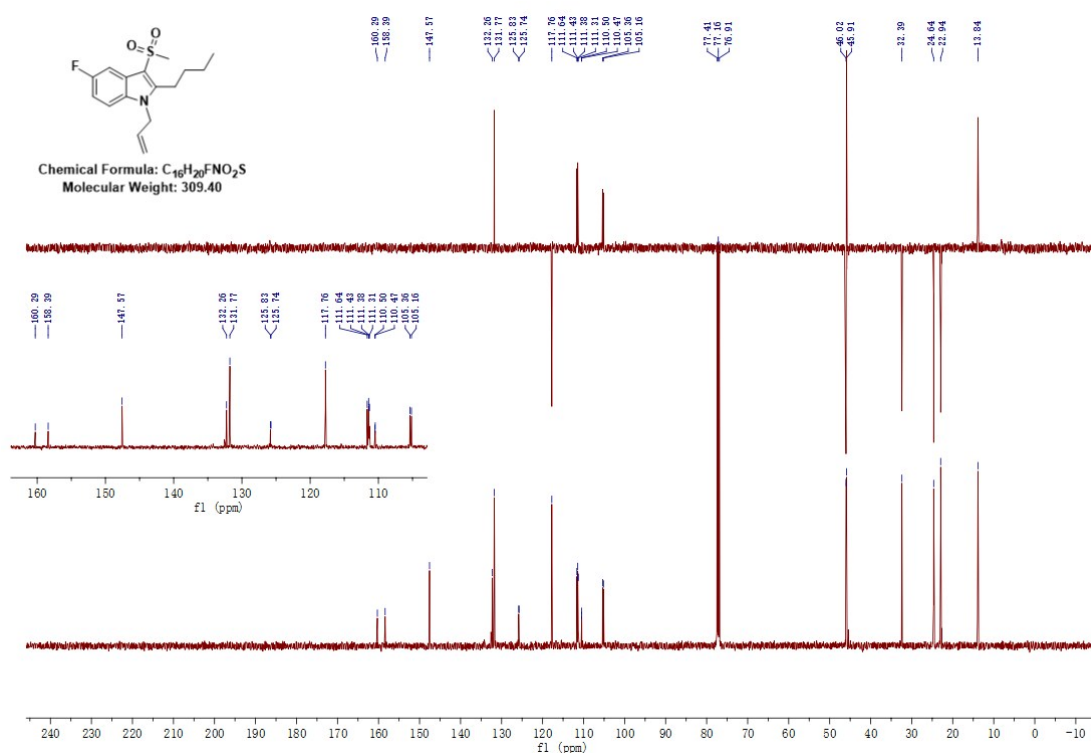

### 3-Allyl-2-butyl-5-chloro-1-(methylsulfonyl)-1H-indole (2k)

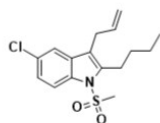

Chemical Formula:  $C_{16}H_{20}ClNO_2S$   
Molecular Weight: 325.85

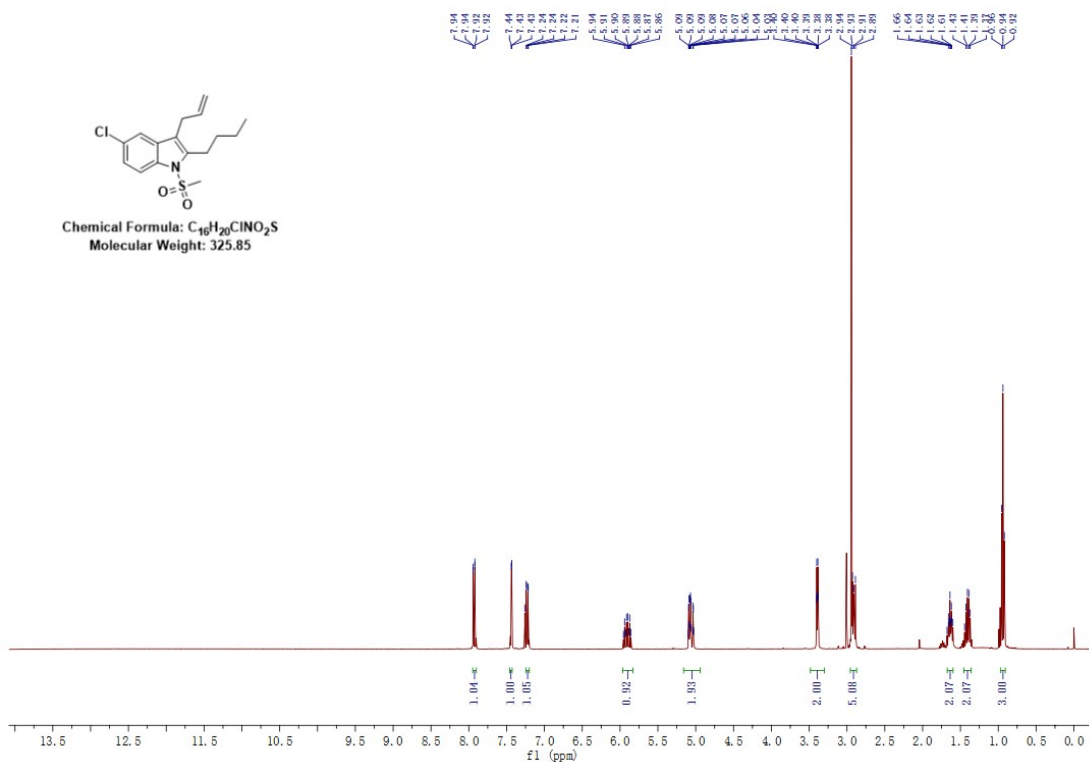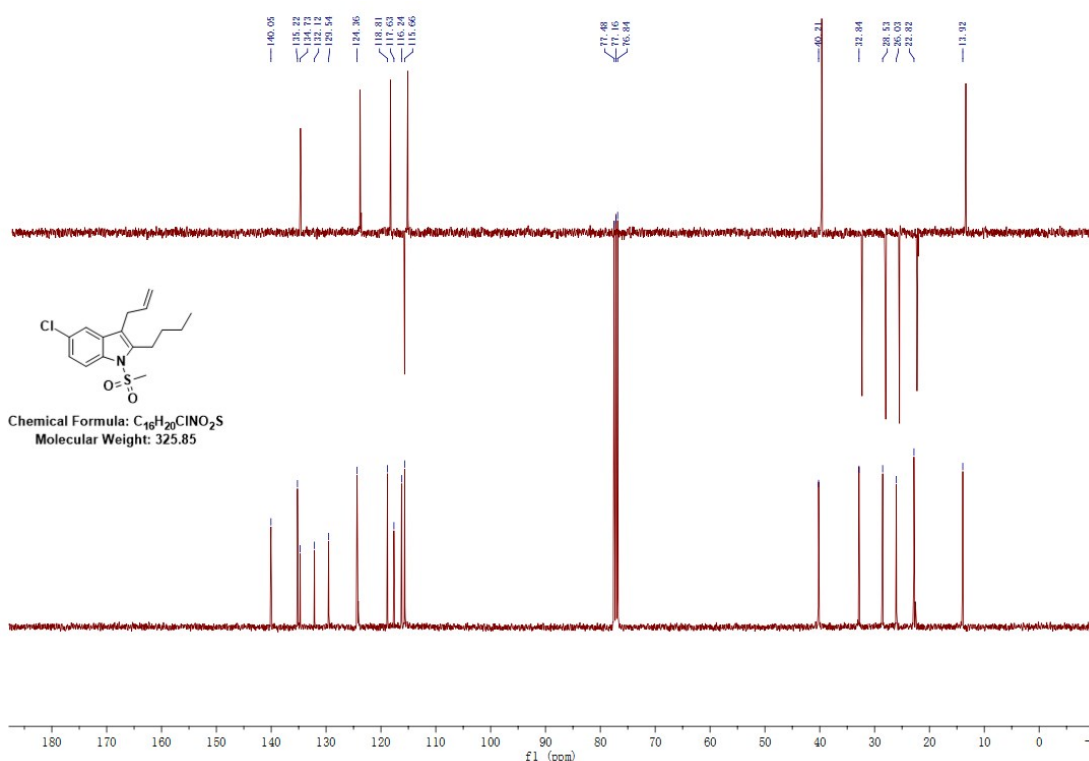

# 1-Allyl-2-butyl-5-chloro-3-(methylsulfonyl)-1H-indole (3k)

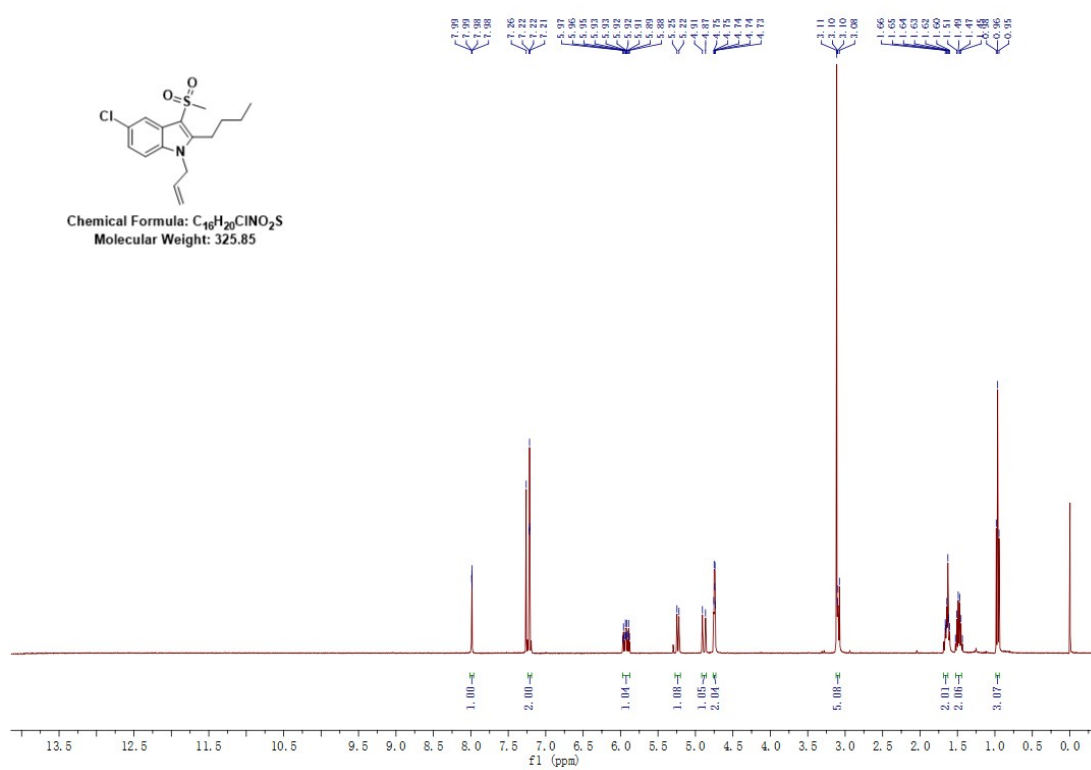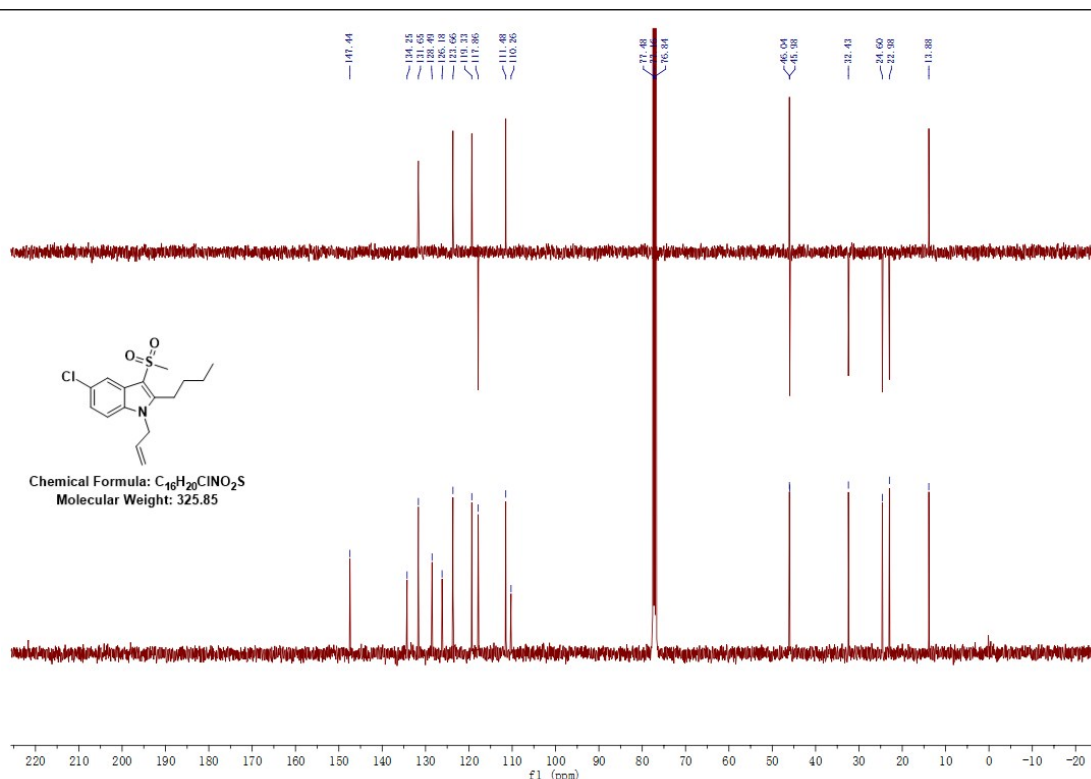

### 3-Allyl-6-bromo-2-butyl-1-(methylsulfonyl)-1*H*-indole (**21**)

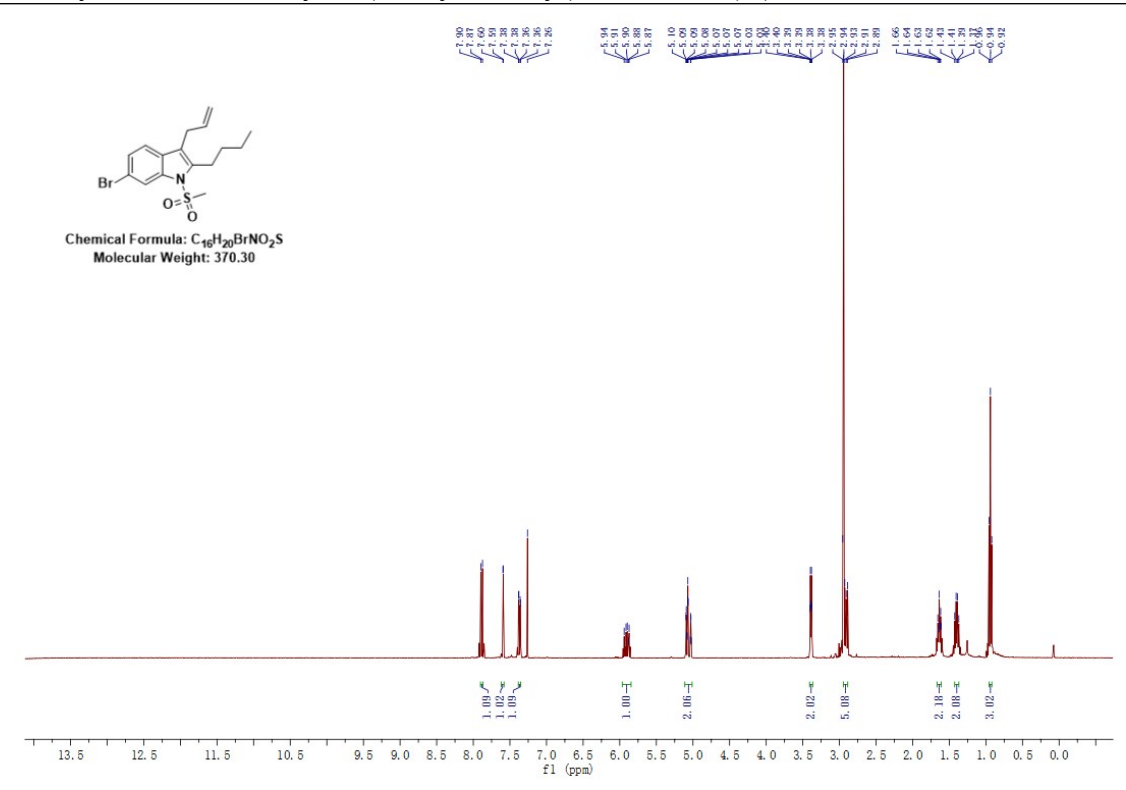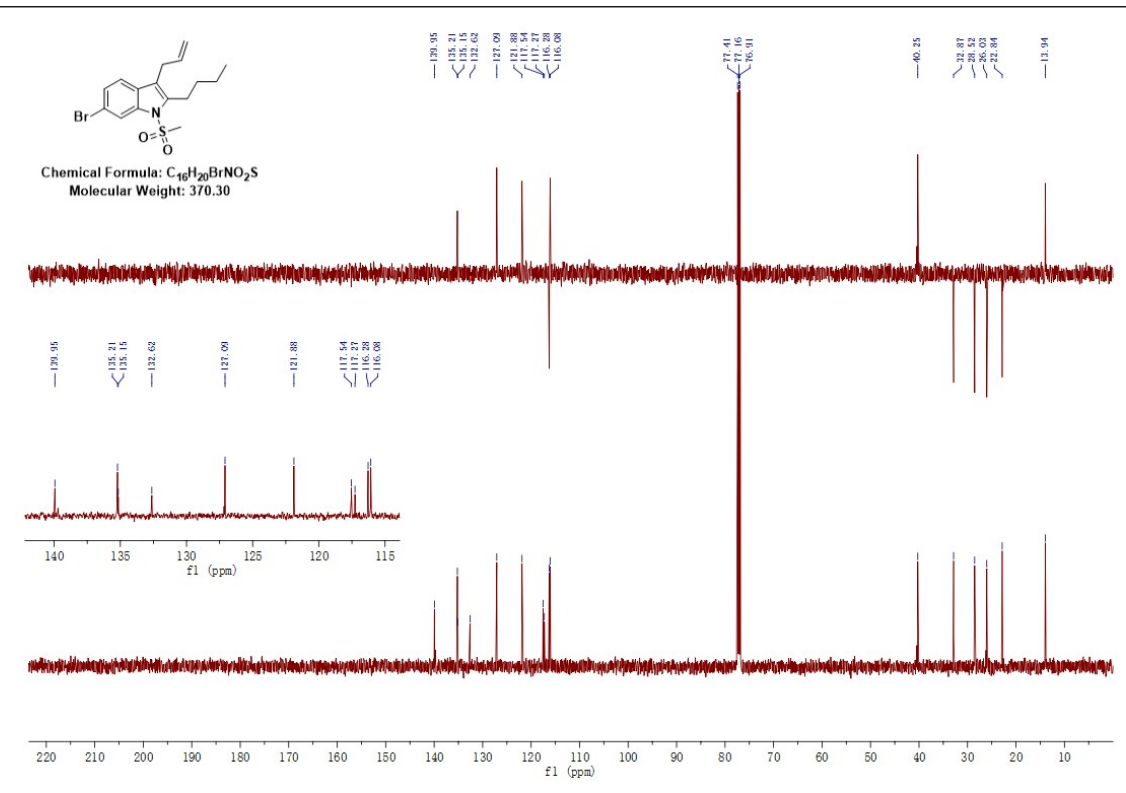

# 1-Allyl-6-bromo-2-butyl-3-(methylsulfonyl)-1*H*-indole (31)

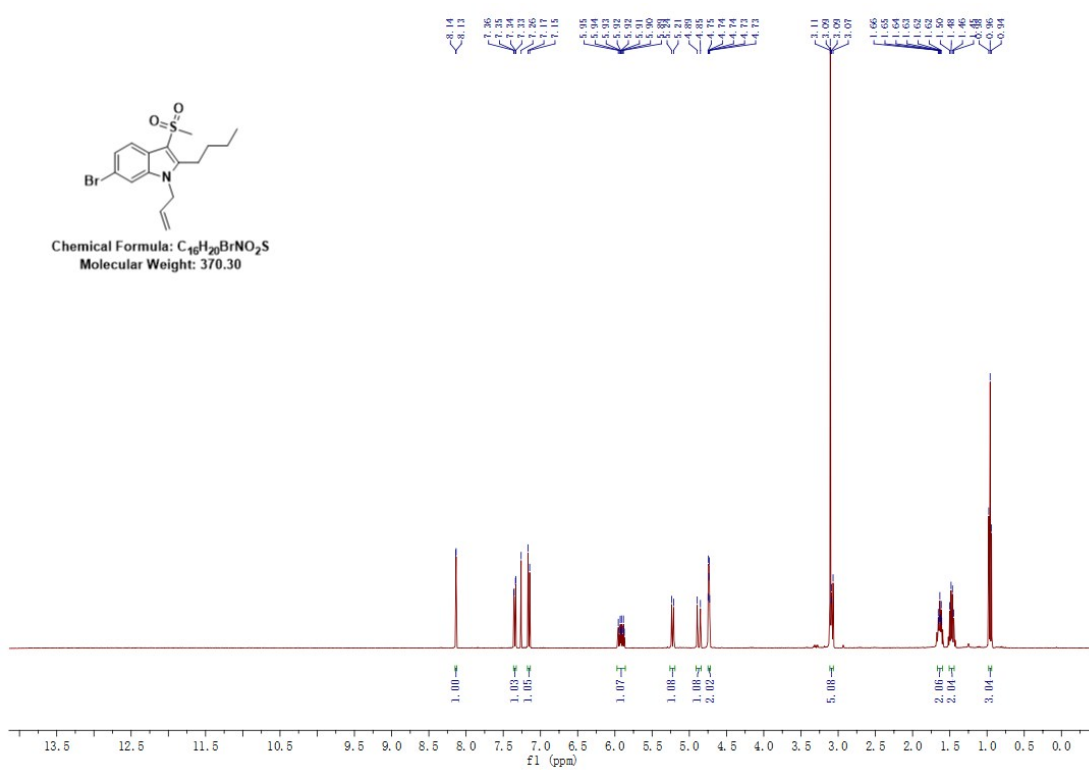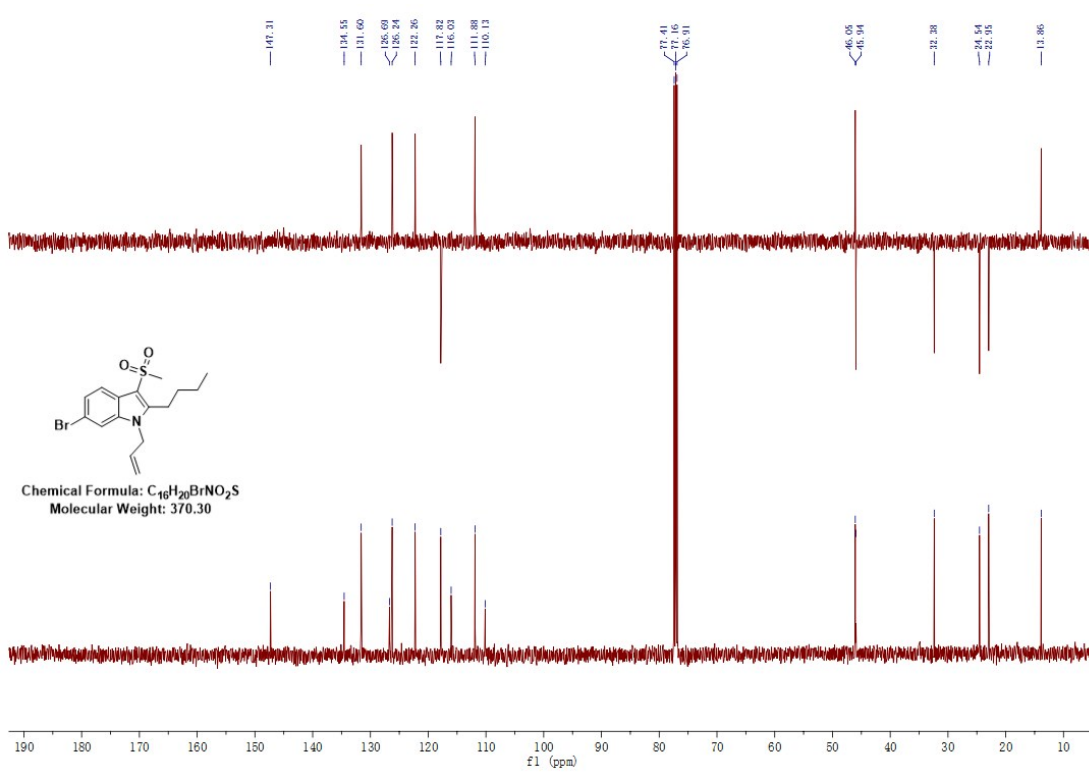

### 3-Allyl-2-butyl-6-methyl-1-(methylsulfonyl)-1*H*-indole (**2m**)

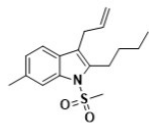

Chemical Formula: C<sub>17</sub>H<sub>23</sub>NO<sub>2</sub>S  
Molecular Weight: 305.44

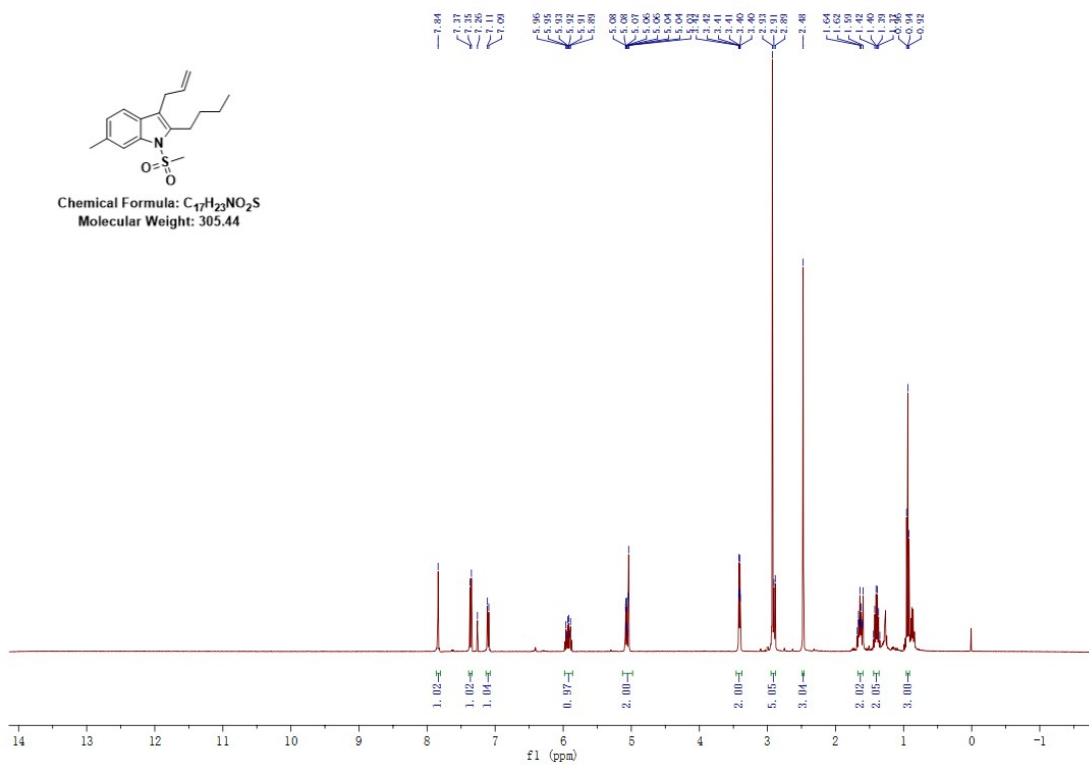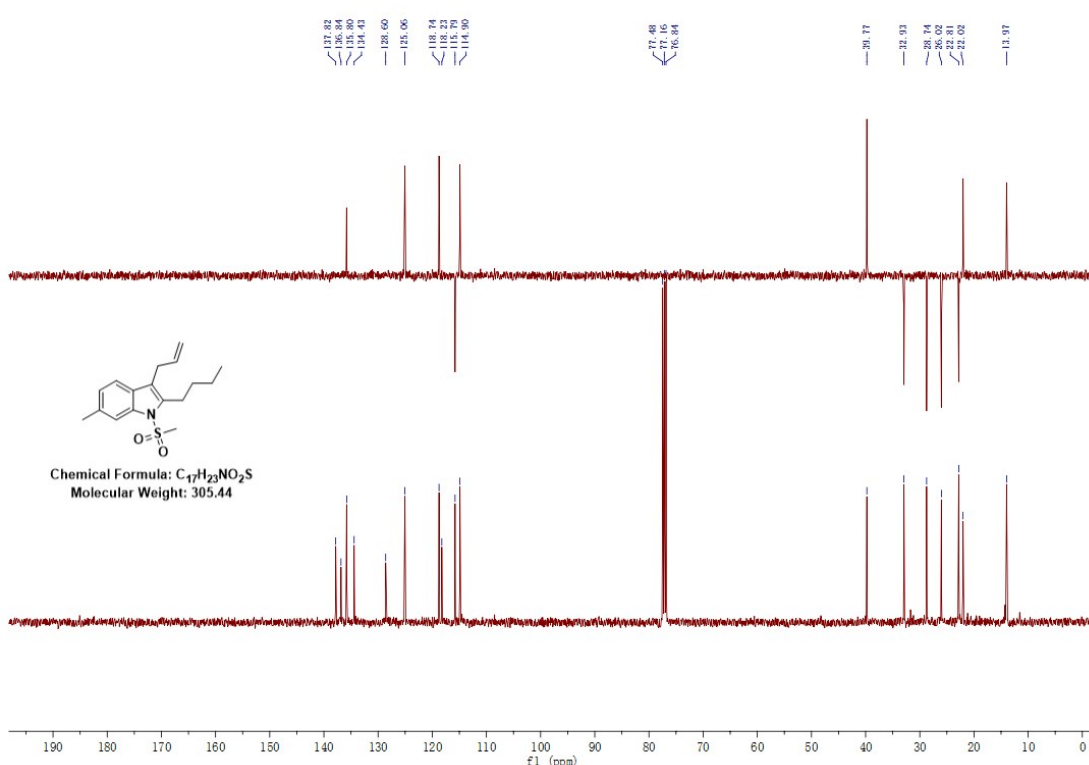



# 1-Allyl-2-butyl-6-methyl-3-(methylsulfonyl)-*1H*-indole (3m)

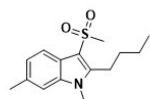

Chemical Formula:  $C_{17}H_{23}NO_2S$   
Molecular Weight: 305.44

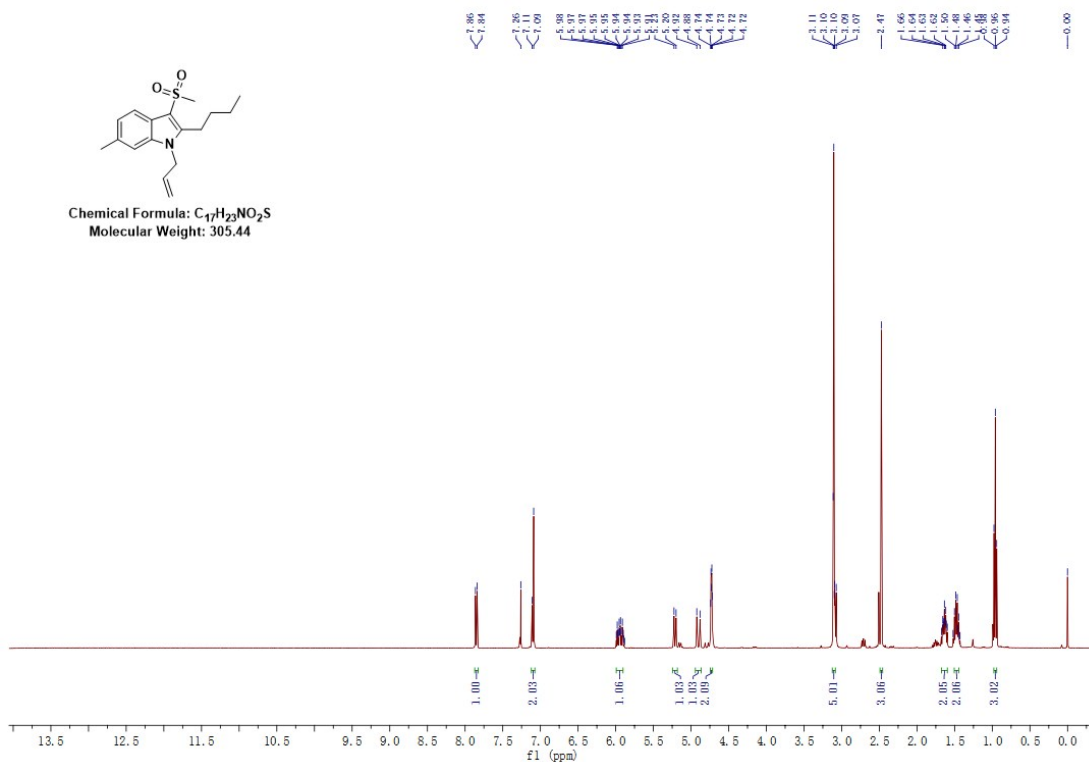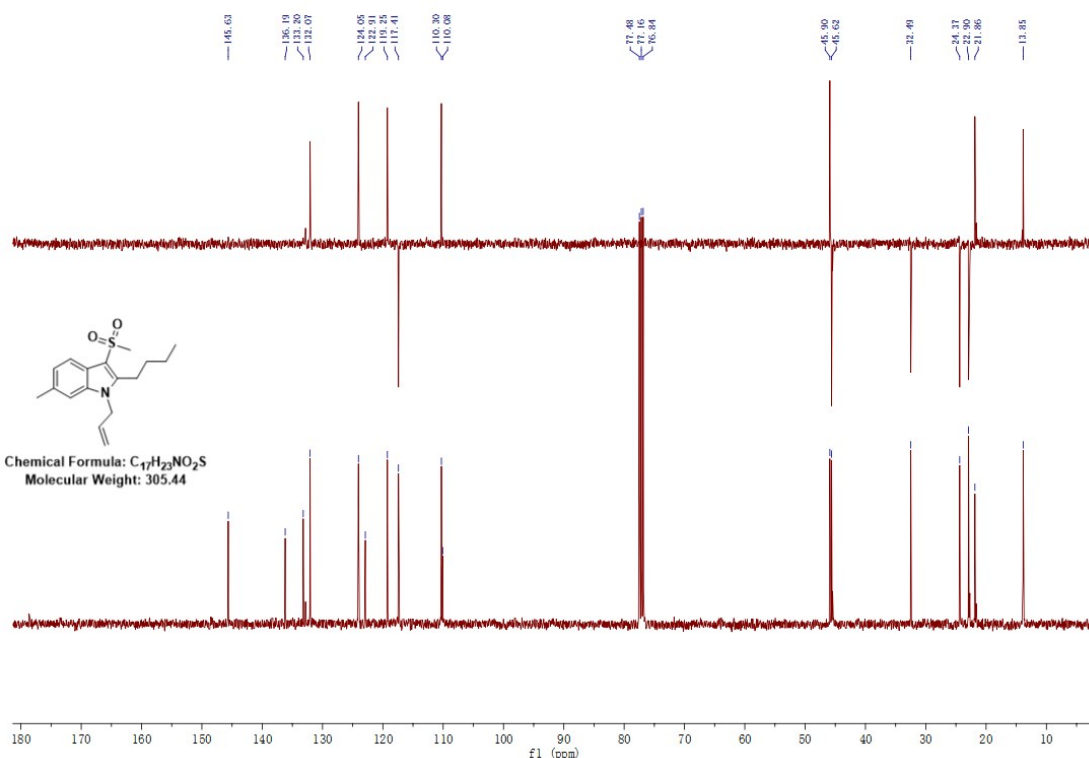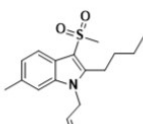

Chemical Formula:  $C_{17}H_{23}NO_2S$   
Molecular Weight: 305.44

### 3-Allyl-2-butyl-1-(methylsulfonyl)-*1H*-indole-5-carbonitrile (**2n**)

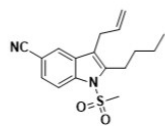

Chemical Formula: C<sub>17</sub>H<sub>20</sub>N<sub>2</sub>O<sub>2</sub>S  
Molecular Weight: 316.42

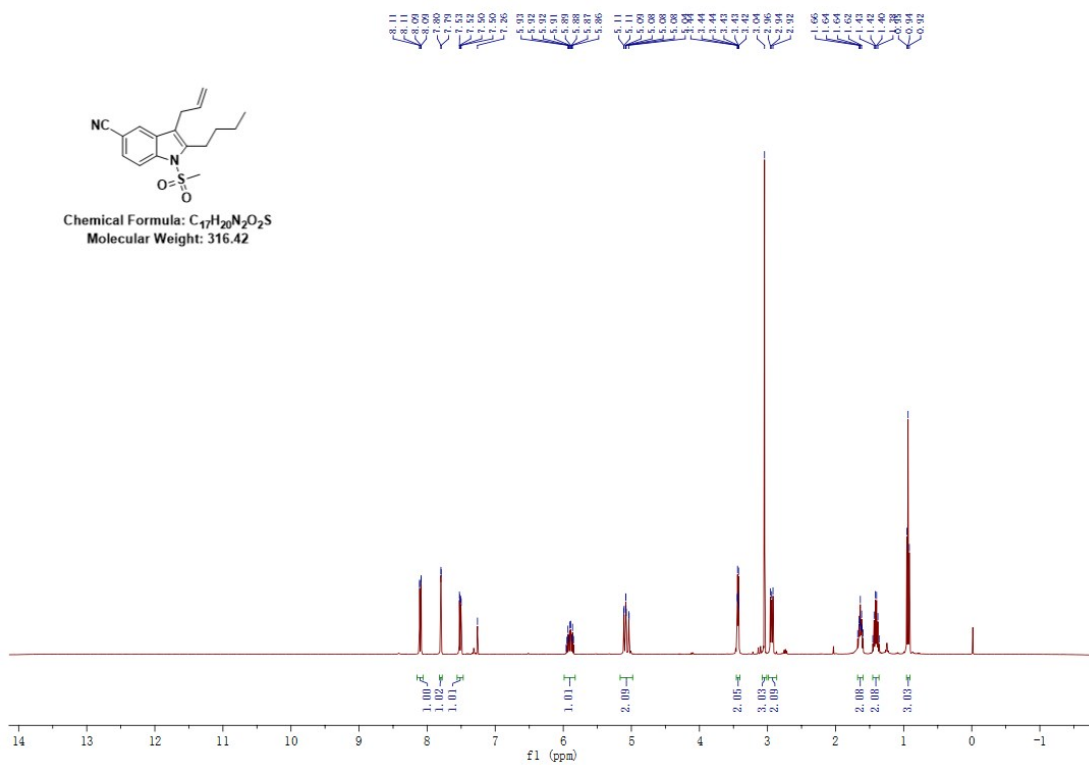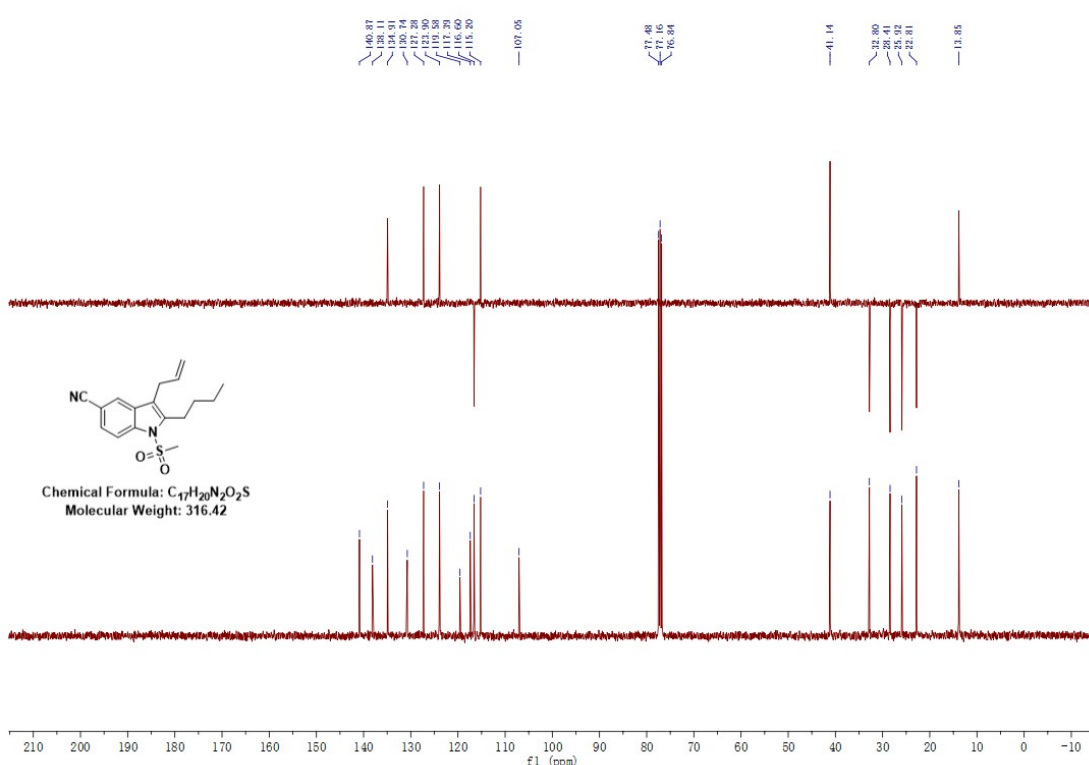

# 1-Allyl-2-butyl-3-(methylsulfonyl)-*1H*-indole-5-carbonitrile (**3n**)

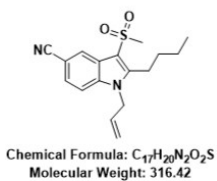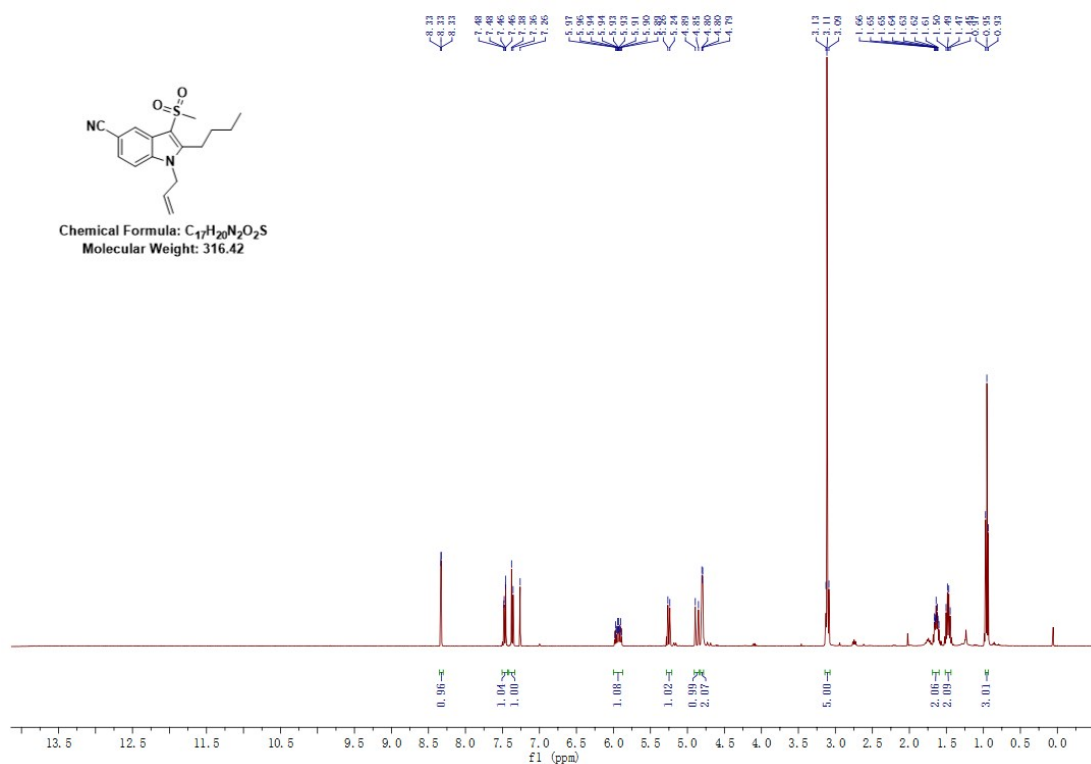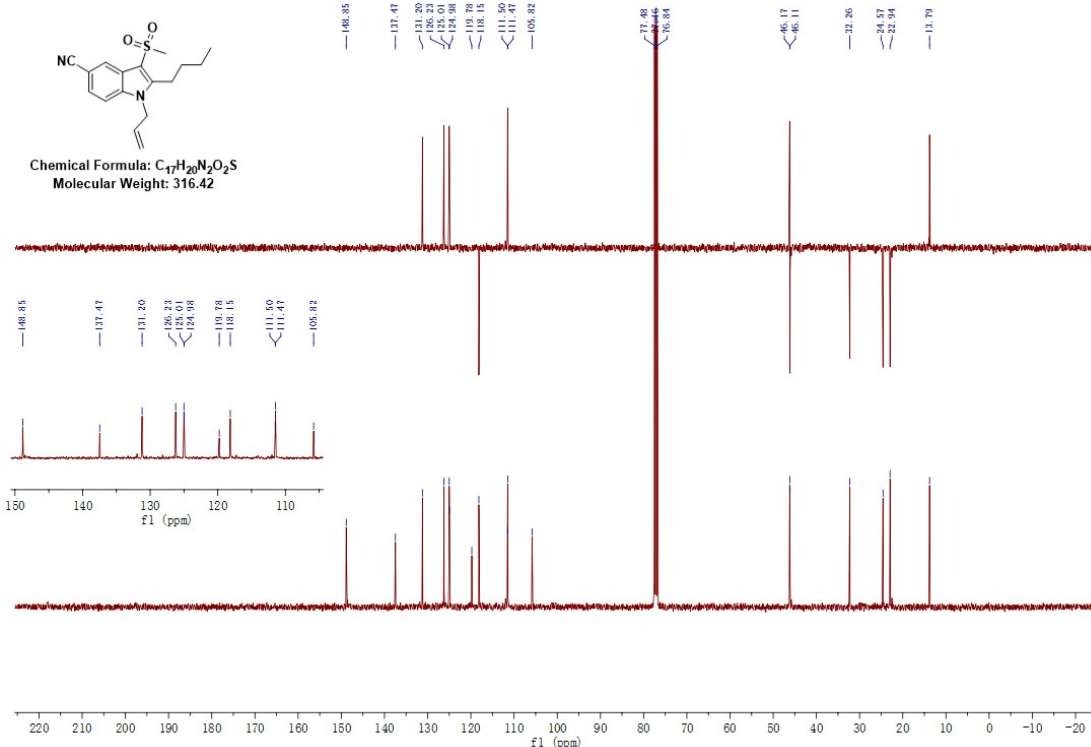

### 3-Allyl-2-butyl-1-(methylsulfonyl)-5-(trifluoromethyl)-1*H*-indole (**2o**)

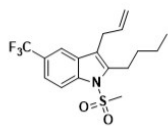

Chemical Formula: C<sub>17</sub>H<sub>20</sub>F<sub>3</sub>NO<sub>2</sub>S  
Molecular Weight: 359.41

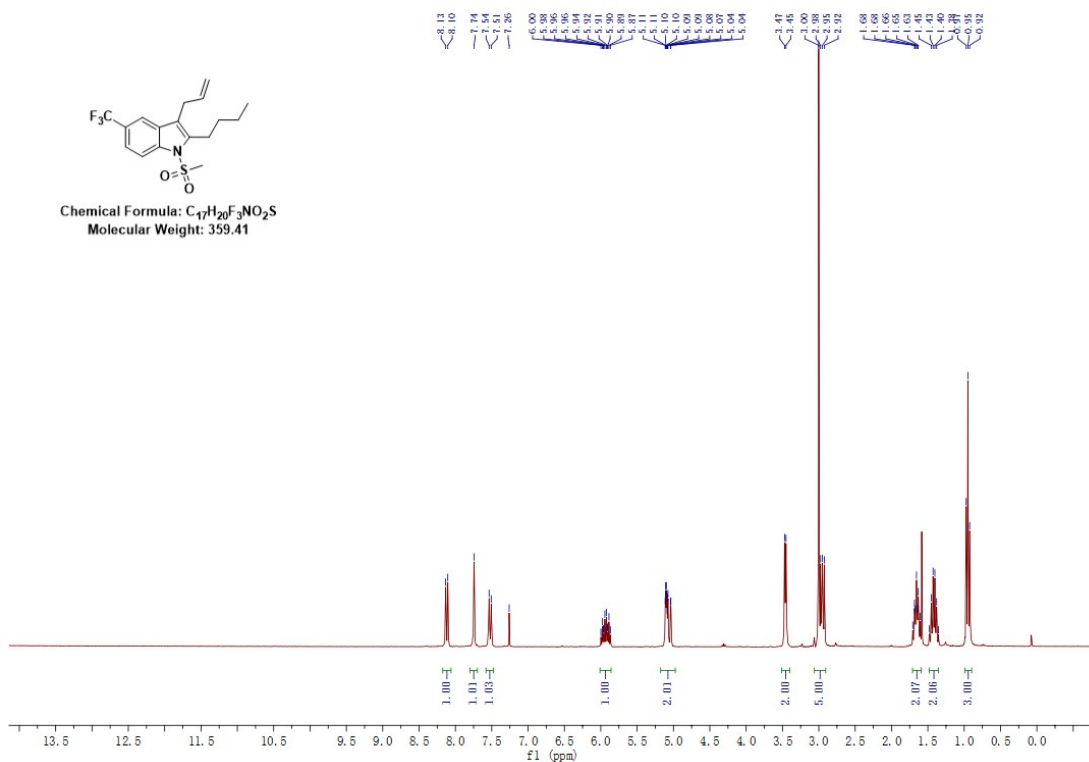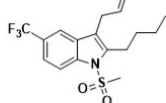

Chemical Formula: C<sub>17</sub>H<sub>20</sub>F<sub>3</sub>NO<sub>2</sub>S  
Molecular Weight: 359.41

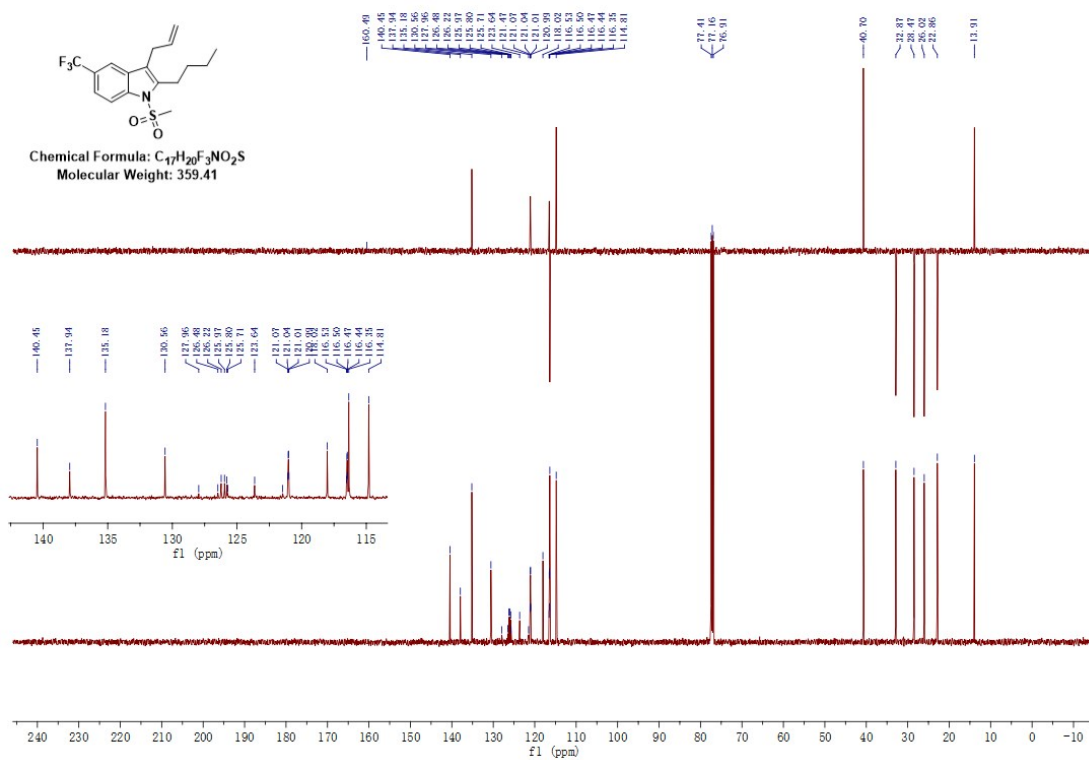

# 1-Allyl-2-butyl-3-(methylsulfonyl)-5-(trifluoromethyl)-1H-indole (30)

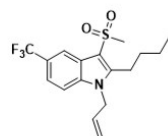

Chemical Formula: C<sub>17</sub>H<sub>20</sub>F<sub>3</sub>NO<sub>2</sub>S  
Molecular Weight: 359.41

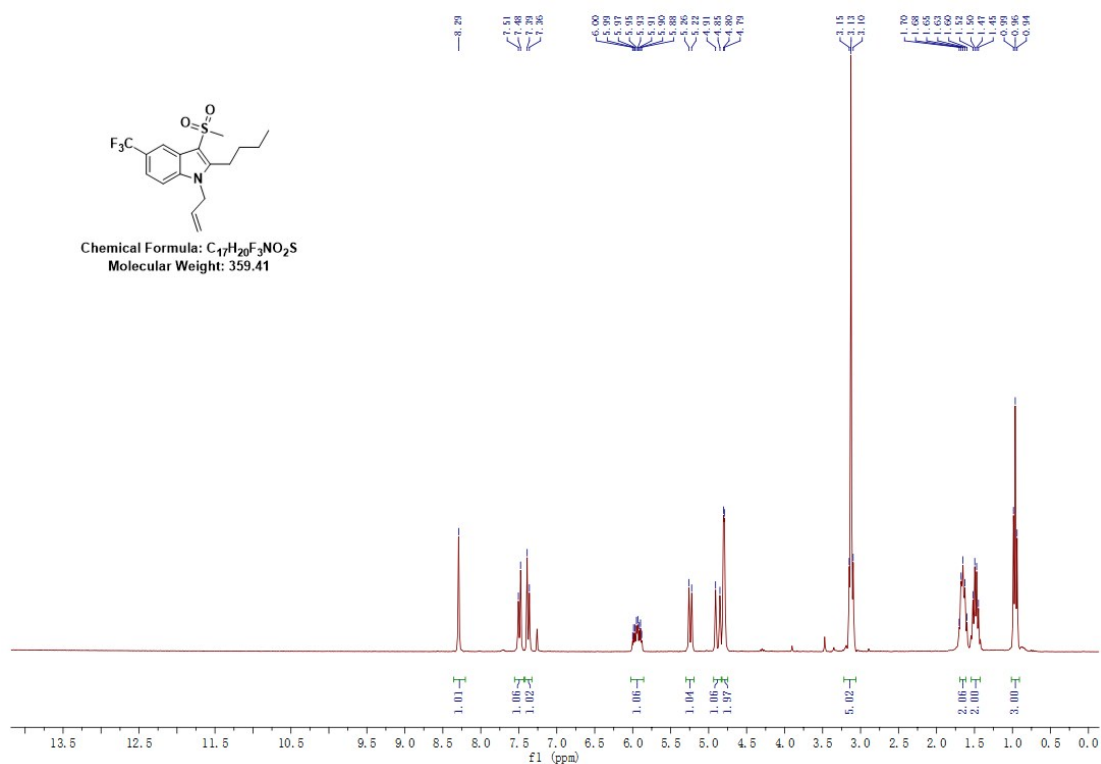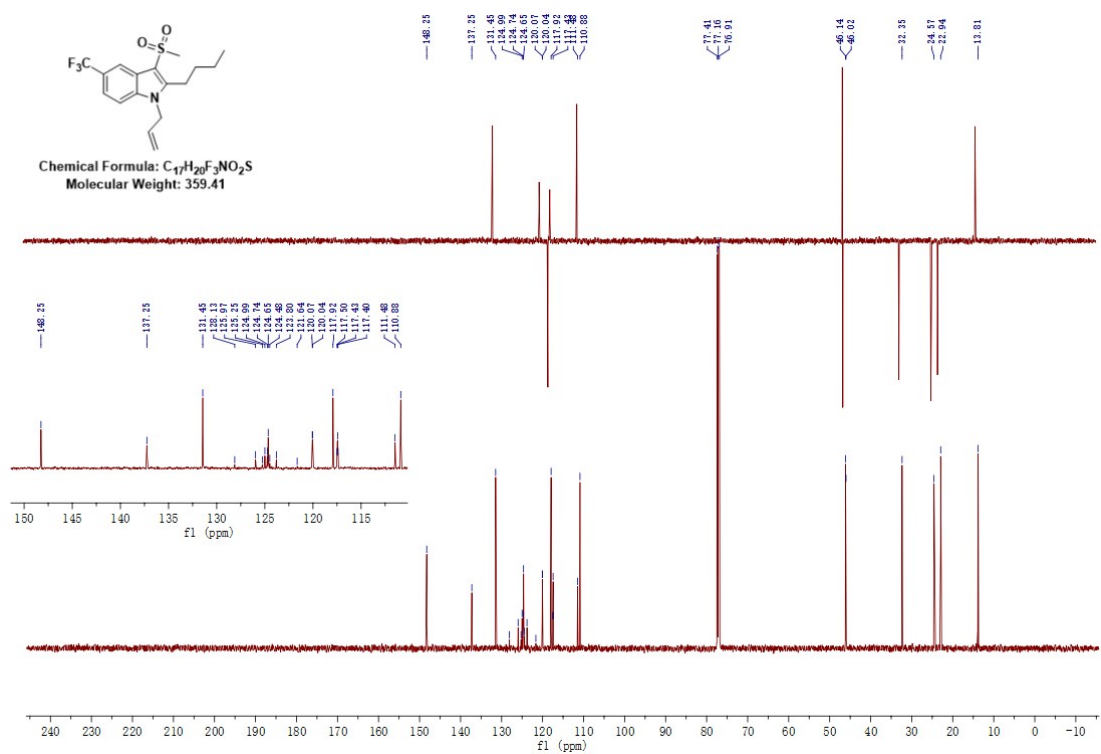

Supplement: c6ra15945a1.pdf [file c6ra15945a1.pdf]
